# Supplementary material for: Metrics for assessing Linear Inverse Problems: a case study of a Trace Gas Inversion
Source: Copernicus journal article supplement (doi:10.5194/gmd-2022-89), 2022-05-23
Supplement: Supplementary file 1 [file gmd-2022-89-supplement-version3.zip]

```

% Written by Vineet Yadav 2/8/2022
% To go with paper
% Metrics for assessing Linear Inverse Problems: A case study of a Trace
% Gas Inversion
% Load All The Relevant Data
% Please Change Paths Accordingly
% Sensitivity with respect to observations
clc % clear console
clear all % clear all variables from the workspace
% Note windows kind of paths
% loads a matrix that contains prior and lat lon domain of inversion
dataPath = uigetdir(path);
% Addpath for code files
addpath(genpath(dataPath))
% repeat covariate as we only have annual
% covariate that is like invariant prior
% Load forward operator, observations and parameters for Q and R
load([dataPath, '\', 'data_section_3.1.mat'])

```

## Coordinates of Sites that Measure Methane and other details about observations

```

towerNames={'ONT', 'FUL', 'CMP', 'GRA', 'USC', 'UCI', 'PSA', 'BND'};
timePeriods=2;
% Observation time is stored in amap variable
obsTime=[amap_ONT(:,1) 1*ones(size(amap_ONT,1),1);...% 1 represents ONT
    amap_FUL(:,1) 2*ones(size(amap_FUL,1),1);...% 2 represents FUL
    amap_CMP(:,1) 3*ones(size(amap_CMP,1),1);...
    amap_GRA(:,1) 4*ones(size(amap_GRA,1),1);...
    amap_USC(:,1) 5*ones(size(amap_USC,1),1);...
    amap_UCI(:,1) 6*ones(size(amap_UCI,1),1);...
    amap_PSA(:,1) 7*ones(size(amap_PSA,1),1);...
    amap_BND(:,1) 8*ones(size(amap_BND,1),1)];
% Number of observations available from each tower
towerSize=[size(amap_ONT,1) size(amap_FUL,1) size(amap_CMP,1) ...
    size(amap_GRA,1) size(amap_USC,1) size(amap_UCI,1) size(amap_PSA,1) ...
    size(amap_BND,1)];
% tower coordinates that measures Methane CH4
towerCoord = [34.064167 -117.583611 % Ontario
    33.880417 -117.884122 % Fullerton
    33.873792 -118.276806 % Compton
    34.283889 -118.4725 % Granada Hills
    34.021447 -118.288844 % University of Southern California
    33.644422 -117.844181 % University of California Irvine
    34.1366 -118.12641 % Pasadena
    34.087686 -117.310167]; % San Bernardino
% Time When Observations Were Taken
obsTimePre=[linspace(1,size(H,1),size(H,1))' ...
    obsTime datevec(obsTime(:,1))];
obsTowers=num2cell(obsTime(:,2));
% This is just list tower name with each observation time
obsTowers(obsTime(:,2)==1)={'ONT'}; % Ontario

```

```

obsTowers(obsTime(:,2)==2)={'FUL'}; % Fullerton
obsTowers(obsTime(:,2)==3)={'CMP'}; % Compton
obsTowers(obsTime(:,2)==4)={'GRA'}; % Granada Hills
obsTowers(obsTime(:,2)==5)={'USC'}; % University of Southern California
obsTowers(obsTime(:,2)==6)={'UCI'}; % University of California Irvine
obsTowers(obsTime(:,2)==7)={'PSA'}; % Pasadena
obsTowers(obsTime(:,2)==8)={'BND'}; % San Bernardino

```

## Plot Spatial Domain or the region of The Study

```

% DOMAIN OF THE STUDY VARIABLES [PLOTING: NOTHING RELATED TO EQUATIONS]
fluxD=size(H,2)/2;% total no of flux grid cells. Two 4 day time periods
% Create grid of latitude and longitude
% Unique latitudes
uniqueLat=unique(latlon(:,2));
% Unique Longitudes
uniqueLon=[unique(latlon(:,1))];
% Grid of Latitude and Longitudes
gridlon1= repmat(uniqueLon,length(uniqueLat),1);
gridlat1= repmat(uniqueLat,1, length(uniqueLon));
% Now we get indices where data would be plotted
% This is the mask
index=zeros(fluxD,2);
for i = 1:fluxD
    [~,col]=min(abs(latlon(i,1)-gridlon1(1,:)));
    [~,row]=min(abs(latlon(i,2)-gridlat1(:,1)));
    index(i,1) = row;
    index(i,2) = col;
end
% This is our plotting grid
mapgrid=ones(size(gridlat1,1),size(gridlon1,2))*NaN;
for i = 1: fluxD
    mapgrid(index(i,1),index(i,2))=1;
end
titles = 'Domain of Study';
h=pcolor(gridlon1,gridlat1,mapgrid);
set(h, 'EdgeColor', 'none');
shading flat; % do not interpolate pixels
axis on;      % display axis
axis tight;   % no white borders
axis image;   % real x,y scaling
set(gca,'fontsize',14)
ylabel('Latitude')
xlabel('Longitude')
title(titles,'FontSize', 14,'Fontname','Arial')
hold on
plot(towerCoord(:,2), towerCoord(:,1),'o','MarkerEdgeColor',[0 .5 .5],...
    'MarkerFaceColor','red' );
text(towerCoord(:,2),towerCoord(:,1),towerNames,'VerticalAlignment',...
    'top','FontSize', 12,'Fontname','Arial','Color','blue')
hold off

```

## Compute IOAMI or Jaccard Index and Jensen-Shannon Matrices for Each Observation

```
% See variables areaCover and jenShannon
% note we convert sparse matrix to full matrix to speed up computation. do
% not do this for large matrices
% This is not optimized code for computing IOAMI or JSD.
% construct H;
H=[H_ONT;H_FUL;H_CMP;H_GRA;H_USC;H_UCI;H_PSA;H_BND];
H=full(H);
IOAMI_CORR=NaN*ones(size(H,1)); % Empty IOAMI CORRELATION Matrix to Fill it with Values
IOAMI_COV=NaN*ones(size(H,1)); % Empty IOAMI Covariance Matrix to Fill it with Values
JSD=NaN*ones(size(H,1)); % Empty Jensen Shannon DISTANCE Matrix to Fill it with Values
for i=1:size(H,1) % Go through footprint matrix row by row. Footprint of each observation is a
    for j=1:size(H,1)
        [IOAMI_CORR(i,j),~,~,~]=ioami_jaccard(H(i,:),H(j,:), 'normalized'); % IOAMI
        [IOAMI_COV(i,j),~,~,~]=ioami_jaccard(H(i,:),H(j,:), 'nonnormalized'); % IOAMI
        normlazed_H_1=H(i,:)./sum(H(i,:),2); % We have to normalize H for JSD so that it become
        normlazed_H_2=H(j,:)./sum(H(j,:),2);
        JSD(i,j)=jsd(normlazed_H_1,normlazed_H_2, 'log_2'); % Jensen Shannon using log with base
        %[,JSD(i,j)]=ioami_jaccard(normlazed_H_1,normlazed_H_2, 'nonnormalized');
    end
end
% Note IOAMI is correlation matrix
JSD=1-JSD; %convert JSD distance matrix to correlation matrix
% Note to get IOAMI correlation matrix to distance matrix do
% IOAMI = 1- IOAMI % Note this is also ((A-B)+(B-A))/(AUB)
% Eigen Spectrum of IOAMI & JSD. It is check for positive semidefiniteness
eigen_IOAMI_CORR=eig(IOAMI_CORR);
eigen_IOAMI_COV=eig(IOAMI_COV);
eigen_JSD=eig(JSD);
% Test for correlation matrix
% (1) Symmetric
% (2) Ranges between -1 to 1. JSD only ranges between 0 and 1 and IOAMI by
% Definition should also be between 0 and 1 for footprints or Jacobian
% (3) It should be positive semidefinite
```

## Plot Eigenvalues of the IOAMI and JSD Correlation Matrices of H to see they are Positive Definite

```
close all % close all existing figures
% Note All Eigenvalues should be >=0 which shows that it is Positive
% Definite Matrix
plot(eigen_IOAMI_CORR); % line plot of eigen values of IOAMI
hold on % hold to plot another line
plot (eigen_JSD); % line plot of eigen values of IOAMI
% Labels and Title for Plots
ylabel('Eigen Values','FontSize',14)
xlabel('Eigen Value No','FontSize',14)
legend({'IOAMI','JSD'}, 'Location','northwest','FontSize',14)
title('Eigenspectrum','FontSize',14)
grid on % show grid on the plot
set(gca, 'FontSize',14)
```

```
hold off
```

## Plot IOAMI Correlation Matrix of the Jacobian (H) to see its Structure

```
% Empty display to create Gap between Figures and Tables of Matrices
disp(' ');
disp(' ');
disp(' ');
% Image Display of Correlation Matrix
imagesc(IOAMI_CORR)
ylabel('Col No','FontSize',14)
xlabel('Row No','FontSize',14)
axis off;
title('IOAMI Correlation Matrix','FontSize',14)
color=colorbar; color.Label.String = 'Correlation';
colormap Jet;
set(gca,'FontSize',14)
```

## PLOT JSD Correlation Matrix of the Jacobian (H) to see its Structure

```
% Empty display to create Gap between Figures and Tables of Matrices
disp(' ');
disp(' ');
disp(' ');
% Image Display of Correlation Matrix
imagesc(JSD)
ylabel('Col No','FontSize',14)
xlabel('Row No','FontSize',14)
title('JSD Correlation Matrix','FontSize',14)
color=colorbar; color.Label.String = 'Correlation'; color.FontSize=14;
colormap Jet;
set(gca,'FontSize',14)
```

## Compare IOAMI and JSD Correlation Matrices

```
% The matrix with lower condition number is better and same goes with
% respect to the Norm. Especially, if it is used as representative of spatio-temporal correlati
% variations
cond_IOAMI=cond(IOAMI_CORR);
cond_JSD=cond(JSD);
% compute frobenius norm
norm_IOAMI=norm(IOAMI_CORR,'fro');
norm_JSD=norm(JSD,'fro');
% compute distance between two correlation matrices formula from
% Correlation Matrix Distance, a Meaningful Measurefor Evaluation of Non-Stationary MIMO Channel
correlation_distance=1-(trace(IOAMI_CORR*JSD)/(norm_IOAMI*norm_JSD));
% note range of correlation distance is between 0 - 1 with 0 being same and
% 1 being completely dissimilar. For details see:
% See: Herdin, Markus, et al. "Correlation matrix distance, a meaningful measure
```

```

% for evaluation of non-stationary MIMO channels." 2005 IEEE 61st Vehicular
% Technology Conference. Vol. 1. IEEE, 2005.
% Smaller condition number means better behaved matrix for constructing a
% covariance matrix
disp(['*****'])
disp(['Distance between IOAMI and JSD Correlation Matrix is ::', num2str(correlation_distance)])
disp(['*****'])
disp(['condition Number of IOAMI Correlation Matrix is ::', num2str(cond_IOAMI)])
disp(['condition Number of JSD Correlation Matrix is ::', num2str(cond_JSD)])
disp(['*****'])
disp(['Frobenius Norm of IOAMI Matrix is ::', num2str(norm_IOAMI)])
disp(['Frobenius NORM of JSD Matrix is ::', num2str(norm_JSD)])
disp(['*****'])

```

## Plot Small Sub-Matrix of IOAMI in the units of Jacobian and Check full IOAMI in the units of the Jacobian is Positive Definite

```

% Empty display to create Gap between Figures and Tables of Matrices
disp(' ');
disp(' ');
disp(' ');
disp(['Outputting first 5 rows and Columns of IOAMI in Units of ppm/micromoles m-2 sec-1 ::'])
IOAMI_COV(1:5,1:5)
% Check if whole IOAMI SubMatrix is Positive Definite by Plotting its Eigen
% Values
close all % close all existing figures
% Note All Eigenvalues should be >=0 which shows that it is Positive
% Definite Matrix
% Empty display to create Gap between Figures and Tables of Matrices
disp(' ');
disp(' ');
disp(' ');
plot(eigen_IOAMI_COV); % line plot of eigen values of IOAMI
ylabel('Eigen Values','FontSize',14)
xlabel('Eigen Value No','FontSize',14)
legend({'IOAMI in units of Jacobian'}, 'Location', 'northwest', 'FontSize', 14)
title({'Eigenspectrum of IOAMI', 'in the units of Jacobian'}, 'FontSize', 14)
grid on % show grid on the plot
set(gca, 'FontSize', 14)
hold off

```

How to construct covariance from IOAMI & JSD correlation Matrix

## Note this is just a hypothetical case of knowing sigma2

Build NonStationary R covariance

```

sigma2=2;
nonParamteric_ioami_covariance=sigma2*IOAMI_COV; % convert correlation to covariance form through

```

## Put IOAMI and Jaccard Index Matrix in Cell Array for Checking Time of Observation

```
% Put Area Stat in Cell Array With Tower Names
tempAreaCover=NaN*ones(size(IOAMI_CORR,1)+2, size(IOAMI_CORR,2)+2);
tempAreaCover(3:end,3:end)=IOAMI_CORR;
tempAreaCover=num2cell(tempAreaCover);
for i=1:size(H,1)
    tempAreaCover{i+2,2}=datestr(obsTimePre(i,2),'yyyymmddHHMM');
    tempAreaCover{2,i+2}=datestr(obsTimePre(i,2),'yyyymmddHHMM');
end
tempAreaCover(3:end,1)=obsTowers(:,1);
tempAreaCover(1,3:end)=obsTowers(:,1)';
tempAreaCover{1,1}='TOWERS';
tempAreaCover{2,2}='TIME';
tempAreaCover{1,2}=[];
tempAreaCover{2,1}=[];
% Empty display to create Gap between Figures and Tables of Matrices
disp(' ');
disp(' ');
disp(' ');
disp('IOAMI CORRELATION MATRIX SEE VARIABLE TEMP AREA COVER')
disp(tempAreaCover);
```

## Plot footprint ioami and JSD correlation of observation from ONT site collected 2015-10-23::1900 with all other observations

See variable tempAreaCover for observation time with IOAMI correlation matrix

Observation time is same for both JSD and IOAMI correlation matrix

```
close all % close all existing figures
% Note All correlation is between 0 and 1
% Note Correlation with Itself is one;
% Empty display to create Gap between Figures
disp(' ');
disp(' ');
disp(' ');
plot(IOAMI_CORR(1:end,1)); % line plot of IOAMI correlation of ONT obs with all other obs
hold on % hold to plot another line
plot(JSD(1:end,1)); % line plot of IOAMI correlation of ONT obs with all other obs
% Labels and Title for Plots
ylim([0 1])
ylabel('Correlation','FontSize',14)
xlabel({'Observation (see first column of','variable tempAreaCover for time and towers'},'FontSize',14)
legend({'IOAMI','JSD'},'Location','northwest','FontSize',14)
title({'Correlation between footprint of an ONT Observation',' (2015-10-23::1900) with other fo
grid on % show grid on the plot
set(gca,'FontSize',14)
hold off
```

## COMPUTE SPATIO-TEMPORAL AREA OF DOMINANCE (STAD)

```
% STAD: We WILL APPLY STAD ON MEAN SENSITIVITY DUE TO TOTAL NO OF
% OBSERVATIONS THAT VARIES BY SITE
% Compute Mean Sensitivity
obsTowers(obsTime(:,2)==1)={'ONT'}; % Ontario
obsTowers(obsTime(:,2)==2)={'FUL'}; % Fullerton
obsTowers(obsTime(:,2)==3)={'CMP'}; % Compton
obsTowers(obsTime(:,2)==4)={'GRA'}; % Granada Hills
obsTowers(obsTime(:,2)==5)={'USC'}; % University of Southern California
obsTowers(obsTime(:,2)==6)={'UCI'}; % University of California Irvine
obsTowers(obsTime(:,2)==7)={'PSA'}; % Pasadena
obsTowers(obsTime(:,2)==8)={'BND'}; % San Bernardino
% Mean H Column Wise
H_Mean_Sensitivity=[mean(H_ONT)' mean(H_FUL)' mean(H_CMP)' mean(H_GRA)' mean(H_USC)' ...
    mean(H_UCI)' mean(H_PSA)' mean(H_BND)'];
% we have two time period for which we are computing fluxes therefore we
% sum sensitivities to get it for one time-period that would cover a 4-day
% overlapping time period
H_Mean_Sensitivity=full(H_Mean_Sensitivity(1:fluxD,:)+H_Mean_Sensitivity(fluxD+1:end,:));
% Find Gridcells of Dominance
loopLimit=size(H_Mean_Sensitivity,2);
storeDominanceIndex=NaN*ones(fluxD,1);
maxH=full(max(H_Mean_Sensitivity,[],2));
for i=1:loopLimit
    zeroH=maxH-H_Mean_Sensitivity(:,i);
    iR=find(zeroH==0);
    storeDominanceIndex(iR,1)=i;
end
```

## PLOT STAD

```
% This is our plotting grid
mapgrid=ones(size(gridlat1,1),size(gridlon1,2))*NaN;
for i = 1: fluxD
    mapgrid(index(i,1),index(i,2))=storeDominanceIndex(i);
end
%titles ='STAD FOR ALL SITES';
figure('Renderer', 'painters', 'Position', [10 10 1100 700])
nexttile
h=pcolor(gridlon1,gridlat1,mapgrid);
% h.FaceColor
% h.EdgeColor
h.FaceAlpha=0.75;
set(h, 'EdgeColor', 'none');
shading flat; % do not interpolate pixels
axis on;      % display axis
axis tight;   % no white borders
axis image;   % real x,y scaling
colormap(parula(8));
colorbar('XTickLabel',{'ONT','FUL','CMP','GRA','USC','UCI','CIT','BND'},'TickDirection','out')
```



```

% alpha(h,0.5);
ylabel('Latitude')
xlabel('Longitude')
hold on
plot(towerCoord(:,2), towerCoord(:,1), '*', 'MarkerEdgeColor',[0 0 0],...
     'MarkerFaceColor',[0 0 0] , 'MarkerSize', 14, 'LineWidth',1.5);
hold on
text(towerCoord(:,2),towerCoord(:,1),towerNames, 'Position',[1 1 1], 'VerticalAlignment',...
     'top', 'HorizontalAlignment', 'right', 'FontSize', 18, 'Fontname', 'Arial', 'FontWeight', 'bold', ...
     'FontStyle', 'italic');
hold on
set(gca, 'TickDir', 'out');
%set(gca, 'xticklabel', num2str(tix, '%.1f'))
set(gca, 'xticklabel', num2str(get(gca, 'xtick'), '%.1f'))
set(gca, 'yticklabel', num2str(get(gca, 'ytick'), '%.1f'))
set(gca, 'fontsize', 18)
hn=gca;
hn.LineWidth=1.3;
box off
hold off
%print('stadRegions_vin.png', '-dpng', '-r500')

% h=pcolor(gridlon1,gridlat1,mapgrid);
% set(h, 'EdgeColor', 'none');
% shading flat; % do not interpolate pixels
% axis on;      % display axis
% axis tight;   % no white borders
% axis image;   % real x,y scaling
% set(gca, 'fontsize', 16)
% ylabel('Latitude')
% xlabel('Longitude')
% title(titles, 'FontSize', 16, 'Fontname', 'Arial')
% hold on
% plot(towerCoord(:,2), towerCoord(:,1), '*', 'MarkerEdgeColor',[1 0.5 0],...
%      'MarkerFaceColor',[1 0.5 0] , 'MarkerSize', 14, 'LineWidth',1.5);
% hold on
% text(towerCoord(:,2),towerCoord(:,1),towerNames, 'Position',[4 0.5 0], 'VerticalAlignment',...
%      'top', 'HorizontalAlignment', 'right', 'FontSize', 18, 'Fontname', 'Arial', 'FontWeight', 'bold', ...
%      'FontStyle', 'italic');
% set(gca, 'FontSize', 18, 'TickDir', 'out');
% hn=gca;
% hn.LineWidth=1.3;
% box off
% hold off

% clear grid* IOAMI* index i j JSD* eig* correlatio* dataPath* normalized* mapgrid norm* ans co
%      H_Mean_Sensitivity latlon loopLimit titles store* temp* time* no h max* unique* zero* nFlu
%      noTowers row X obs* tower*

```
