# Supplementary material for: Metrics for assessing Linear Inverse Problems: a case study of a Trace Gas Inversion
Source: Copernicus journal article supplement (doi:10.5194/gmd-2022-89), 2022-05-23
Supplement: Supplementary file 5 [file gmd-2022-89-supplement.zip]

```

% Written by Vineet Yadav and Subhomoy Ghosh 3/25/2022
% To go with paper
% Metrics for assessing Linear Inverse Problems: A case study of a Trace
% Gas Inversion

% Load All The Relavant Data
% Please Change Paths Accordingly
% Sensitivity with respect to observations
clc % clear console
clear all % clear all variables from the workspace
% Note windows kind of paths
% loads a matrix that contains prior and lat lon domain of inversion
dataPath = uigetdir(path);
% Addpath for code files
addpath(genpath(dataPath))
% repeat covariate as we only have annual
% covariate that is like invariant prior
% Load forward operator, observations and parameters for Q and R
load([dataPath, '\', 'data_section_3.1.mat'])

```

## Coordinates of Sites that Measure Methane and other details about observations

```

towerNames={'ONT', 'FUL', 'CMP', 'GRA', 'USC', 'UCI', 'PSA', 'BND'};
timePeriods=2;
% Observation time is stored in amap variable
obsTime=[amap_ONT(:,1) 1*ones(size(amap_ONT,1),1);...% 1 represents ONT
    amap_FUL(:,1) 2*ones(size(amap_FUL,1),1);...% 2 represents FUL
    amap_CMP(:,1) 3*ones(size(amap_CMP,1),1);...
    amap_GRA(:,1) 4*ones(size(amap_GRA,1),1);...
    amap_USC(:,1) 5*ones(size(amap_USC,1),1);...
    amap_UCI(:,1) 6*ones(size(amap_UCI,1),1);...
    amap_PSA(:,1) 7*ones(size(amap_PSA,1),1);...
    amap_BND(:,1) 8*ones(size(amap_BND,1),1)];
% Number of observations available from each tower
towerSize=[size(amap_ONT,1) size(amap_FUL,1) size(amap_CMP,1) ...
    size(amap_GRA,1) size(amap_USC,1) size(amap_UCI,1) size(amap_PSA,1) ...
    size(amap_BND,1)];
% tower coordinates that measures Methane CH4
towerCoord = [34.064167 -117.583611 % Ontario
    33.880417 -117.884122 % Fullerton
    33.873792 -118.276806 % Compton
    34.283889 -118.4725 % Granada Hills
    34.021447 -118.288844 % University of Souther California
    33.644422 -117.844181 % University of California Irvine
    34.1366 -118.12641 % Pasadena
    34.087686 -117.310167]; % San Bernardino
% Time When Observations Were Taken
obsTimePre=[linspace(1,size(H,1),size(H,1))' ...
    obsTime datevec(obsTime(:,1))];
obsTowers=num2cell(obsTime(:,2));
% This is just list tower name with each observation time

```

```

obsTowers(obsTime(:,2)==1)={'ONT'}; % Ontario
obsTowers(obsTime(:,2)==2)={'FUL'}; % Fullerton
obsTowers(obsTime(:,2)==3)={'CMP'}; % Compton
obsTowers(obsTime(:,2)==4)={'GRA'}; % Granada Hills
obsTowers(obsTime(:,2)==5)={'USC'}; % University of Souther California
obsTowers(obsTime(:,2)==6)={'UCI'}; % University of California Irvine
obsTowers(obsTime(:,2)==7)={'PSA'}; % Pasadena
obsTowers(obsTime(:,2)==8)={'BND'}; % San Bernardino

```

## Plot Spatial Domain or the region of The Study

```

% DOMAIN OF THE STUDY VARIABLES [PLOTING: NOTHING RELATED TO EQUATIONS]
fluxD=size(H,2)/2;% total no of flux grid cells. Two 4 day time periods
% Create grid of latitude and longitude
% Unique latitudes
uniqueLat=unique(latlon(:,2));
% Unique Longitudes
uniqueLon=[unique(latlon(:,1)))'];
% Grid of Latitude and Longitudes
gridlon1=repmat(uniqueLon,length(uniqueLat),1);
gridlat1=repmat(uniqueLat,1, length(uniqueLon));
% Now we get indices where data would be plotted
% This is the mask
index=zeros(fluxD,2);
for i = 1:fluxD
    [~,col]=min(abs(latlon(i,1)-gridlon1(1,:)));
    [~,row]=min(abs(latlon(i,2)-gridlat1(:,1)));
    index(i,1) = row;
    index(i,2) = col;
end
% This is our plotting grid
mapgrid=ones(size(gridlat1,1),size(gridlon1,2))*NaN;
for i = 1: fluxD
    mapgrid(index(i,1),index(i,2))=1;
end
titles ='Domain of Study';
h=pcolor(gridlon1,gridlat1,mapgrid);
set(h, 'EdgeColor', 'none');
shading flat; % do not interpolate pixels
axis on;      % display axis
axis tight;   % no white borders
axis image;   % real x,y scaling
set(gca,'fontSize',14)
ylabel('Latitude')
xlabel('Longitude')
title(titles,'FontSize', 14,'Fontname','Arial')
hold on
plot(towerCoord(:,2), towerCoord(:,1),'o','MarkerEdgeColor',[0 .5 .5],...
     'MarkerFaceColor','red' );
text(towerCoord(:,2),towerCoord(:,1),towerNames,'VerticalAlignment',...
     'top','FontSize', 12,'Fontname','Arial','Color','blue')
hold off

```

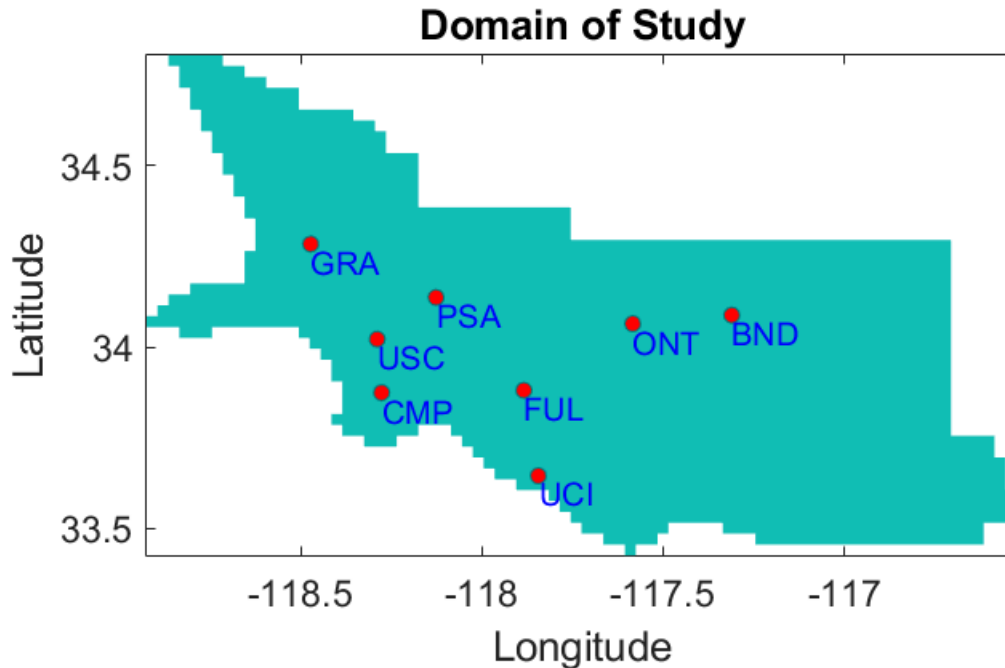

## Compute IOAMI or Jaccard Index and Jensen-Shannon Matrices for Each Observation

```
% See variables areaCover and jenShannon
% note we convert sparse matrix to full matrix to speed up computation. do
% not do this for large matrices
% This is not optimized code for computing IOAMI or JSD.
% construct H;
H=[H_ONT;H_FUL;H_CMP;H_GRA;H_USC;H_UCI;H_PSA;H_BND];
H=full(H);
IOAMI_CORR=NaN*ones(size(H,1)); % Empty IOAMI CORRELATION Matrix to Fill it with Values
IOAMI_COV=NaN*ones(size(H,1)); % Empty IOAMI Covariance Matrix to Fill it with Values
JSD=NaN*ones(size(H,1)); % Empty Jensen Shannon DISTANCE Matrix to Fill it with Values
for i=1:size(H,1) % Go through footprint matrix row by row. Footprint of each observation
    for j=1:size(H,1)
        [IOAMI_CORR(i,j),~,~,~]=ioami_jaccard(H(i,:),H(j,:), 'normalized'); % IOAMI
        [IOAMI_COV(i,j),~,~,~]=ioami_jaccard(H(i,:),H(j,:), 'nonnormalized'); % IOAMI
        normlazed_H_1=H(i,:)./sum(H(i,:),2); % We have to normalize H for JSD so that it sums to 1
        normlazed_H_2=H(j,:)./sum(H(j,:),2);
        JSD(i,j)=jsd(normlazed_H_1,normlazed_H_2, 'log_2'); % Jensen Shannon using log base 2
        %[,JSD(i,j)]=ioami_jaccard(normlazed_H_1,normlazed_H_2, 'nonnormalized');
    end
end
% Note IOAMI is correlation matrix
JSD=1-JSD; %convert JSD distance matrix to correlation matrix
% Note to get IOAMI correlation matrix to distance matrix do
% IOAMI = 1- IOAMI % Note this is also ((A-B)+(B-A))/(A+B)
```

```
% Eigen Spectrum of IOAMI & JSD. It is check for positive semidefiniteness
eigen_IOAMI_CORR=eig(IOAMI_CORR);
eigen_IOAMI_COV=eig(IOAMI_COV);
eigen_JSD=eig(JSD);
% Test for correlation matrix
% (1) Symmetric
% (2) Ranges between -1 to 1. JSD only ranges between 0 and 1 and IOAMI by
% Definition should also be between 0 and 1 for footprints or Jacobian
% (3) It should be positive semidefinite
```

## Plot Eigenvalues of the IOAMI and JSD Correlation Matrices of H to see they are Positive Definite

```
close all % close all existing figures
% Note All Eigenvalues should be >=0 which shows that it is Positive
% Definite Matrix
plot(eigen_IOAMI_CORR); % line plot of eigen values of IOAMI
hold on % hold to plot another line
plot(eigen_JSD); % line plot of eigen values of IOAMI
% Labels and Title for Plots
ylabel('Eigen Values','FontSize',14)
xlabel('Eigen Value No','FontSize',14)
legend({'IOAMI','JSD'},'Location','northwest','FontSize',14)
title('Eigenspectrum','FontSize',14)
grid on % show grid on the plot
set(gca,'FontSize',14)
hold off
```

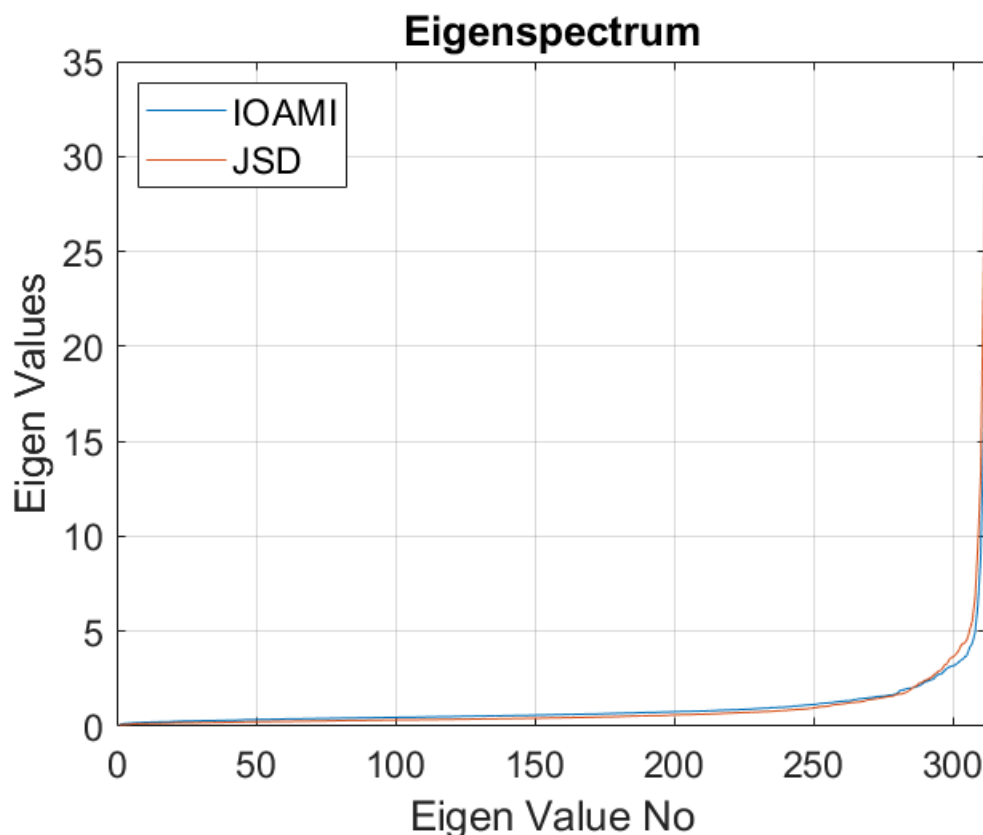

## Plot IOAMI Correlation Matrix of the Jacobian (H) to see its Structure

```
% Empty display to create Gap between Figures and Tables of Matrices  
disp(' ');
```

```
disp(' ');
```

```
disp(' ');
```

```
% Image Display of Correlation Matrix  
imagesc(IOAMI_CORR)  
ylabel('Col No','FontSize',14)  
xlabel('Row No','FontSize',14)  
axis off;  
title('IOAMI Correlation Matrix','FontSize',14)  
color=colorbar; color.Label.String = 'Correlation';  
colormap Jet;  
set(gca,'FontSize',14)
```

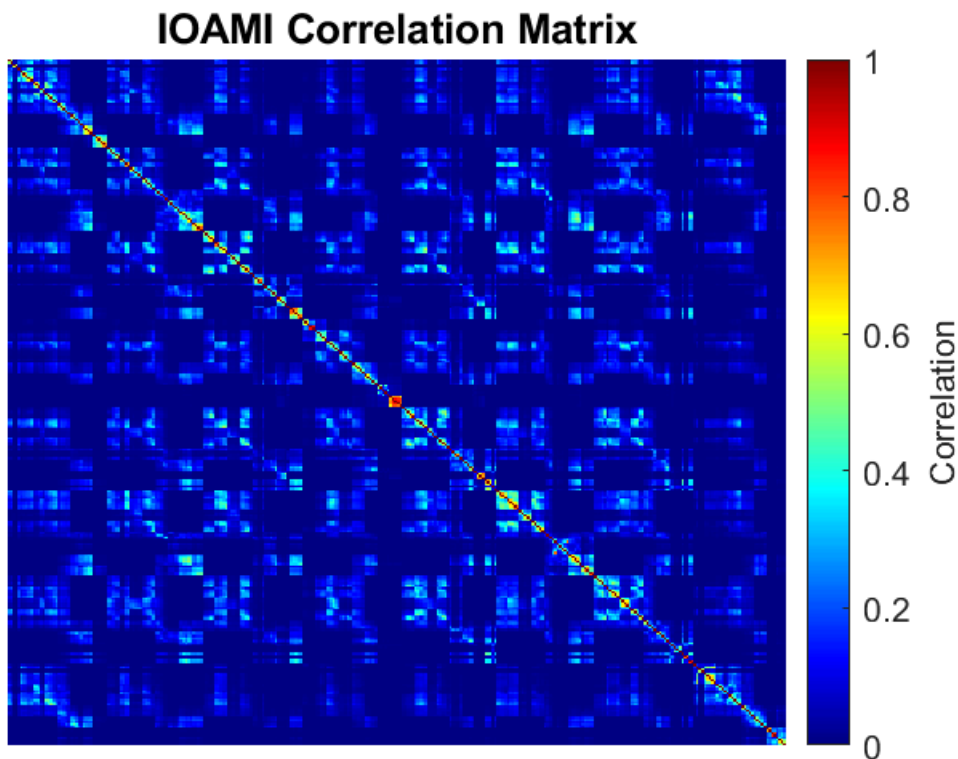

## PLOT JSD Correlation Matrix of the Jacobian (H) to see its Structure

```
% Empty display to create Gap between Figures and Tables of Matrices
disp(' ');
```

```
disp(' ');
```

```
disp(' ');
```

```
% Image Display of Correlation Matrix
imagesc(JSD)
ylabel('Col No','FontSize',14)
xlabel('Row No','FontSize',14)
title('JSD Correlation Matrix','FontSize',14)
color=colorbar; color.Label.String = 'Correlation'; color.FontSize=14;
colormap Jet;
set(gca,'FontSize',14)
```

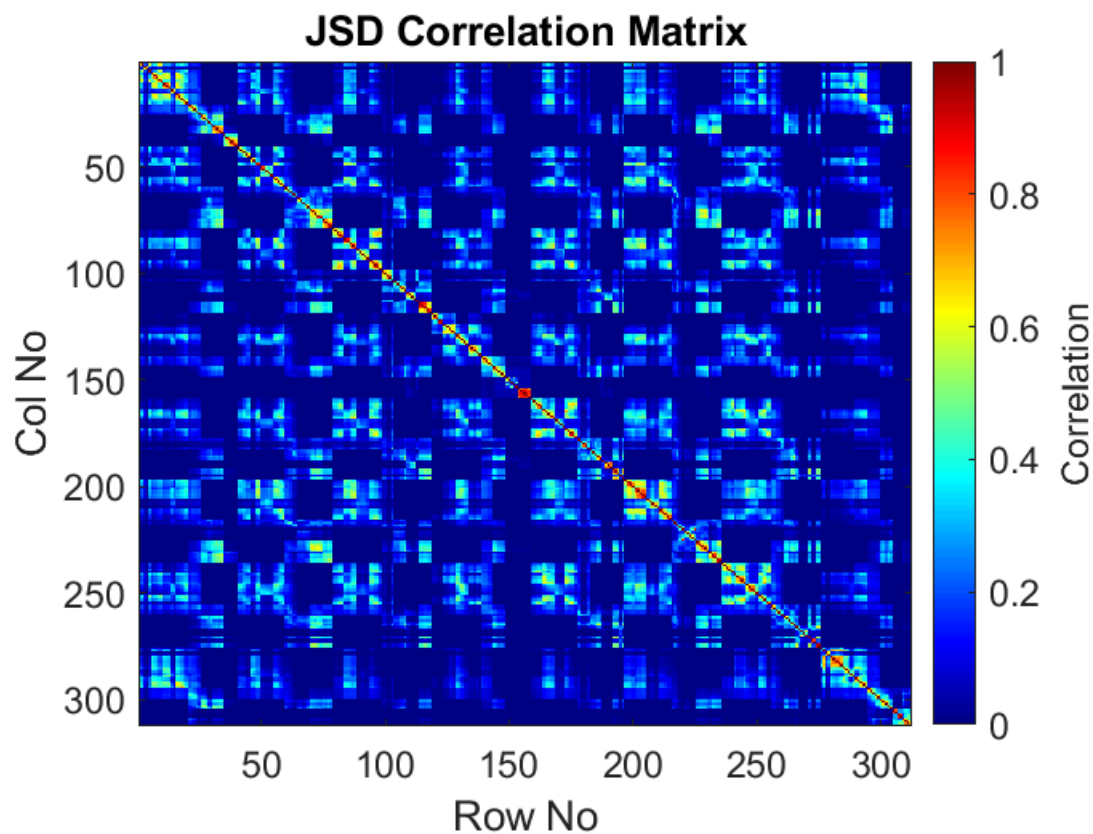

## Compare IOAMI and JSD Correlation Matrices

```
% The matrix with lower condition number is better and same goes with
% respect to the Norm. Especially, if it is used as representative of spatio-temporal c
```

```
% variations
cond_IOAMI=cond(IOAMI_CORR);
cond_JSD=cond(JSD);
% compute frobenius norm
norm_IOAMI=norm(IOAMI_CORR,'fro');
norm_JSD=norm(JSD,'fro');
% compute distance between two correlation matrices formula from
% Correlation Matrix Distance, a Meaningful Measure for Evaluation of Non-Stationary MIMO
correlation_distance=1-(trace(IOAMI_CORR*JSD)/(norm_IOAMI*norm_JSD));
% note range of correlation distance is between 0 - 1 with 0 being same and
% 1 being completely dissimilar. For details see:
% See: Herdin, Markus, et al. "Correlation matrix distance, a meaningful measure
% for evaluation of non-stationary MIMO channels." 2005 IEEE 61st Vehicular
% Technology Conference. Vol. 1. IEEE, 2005.
% Smaller condition number means better behaved matrix for constructing a
% covariance matrix
disp(['*****'])
```

```
*****
```

```
disp(['Distance between IOAMI and JSD Correlation Matrix is ::', num2str(correlation_distance)])
```

```
Distance between IOAMI and JSD Correlation Matrix is ::0.036056
```

```
disp(['*****'])
```

```
*****
```

```
disp(['condition Number of IOAMI Correlation Matrix is ::', num2str(cond_IOAMI)])
```

```
condition Number of IOAMI Correlation Matrix is ::197.2447
```

```
disp(['condition Number of JSD Correlation Matrix is ::', num2str(cond_JSD)])
```

```
condition Number of JSD Correlation Matrix is ::446.3145
```

```
disp(['*****'])
```

```
*****
```

```
disp(['Frobenius Norm of IOAMI Matrix is ::', num2str(norm_IOAMI)])
```

```
Frobenius Norm of IOAMI Matrix is ::34.2742
```

```
disp(['Frobenius NORM of JSD Matrix is ::', num2str(norm_JSD)])
```

```
Frobenius NORM of JSD Matrix is ::49.5054
```

```
disp(['*****'])
```

```
*****
```

## Plot Small Sub-Matrix of IOAMI in the units of Jacobian and Check full IOAMI in the units of the Jacobian is Positive Definite

```
% Empty display to create Gap between Figures and Tables of Matrices
```

```
disp(' ');
```

```
disp(' ');
```

```
disp(' ');
```

```
disp(['Outputting first 5 rows and Columns of IOAMI in Units of ppm/micromoles m-2 sec-
```

```
Outputting first 5 rows and Columns of IOAMI in Units of ppm/micromoles m-2 sec-1 ::
```

```
IOAMI_COV(1:5,1:5)
```

```
ans = 5x5
    2.0760    1.2838    0.0838    0.0720    0.3530
    1.2838    1.6608    0.0762    0.0615    0.3931
    0.0838    0.0762    0.0899    0.0632    0.0321
    0.0720    0.0615    0.0632    0.0851    0.0151
    0.3530    0.3931    0.0321    0.0151    0.5208
```

```
% Check if whole IOAMI SubMatrix is Positive Definite by Plotting its Eigen
% Values
close all % close all existing figures
% Note All Eigenvalues should be >=0 which shows that it is Positive
% Definite Matrix
% Empty display to create Gap between Figures and Tables of Matrices
disp(' ');
```

```
disp(' ');
```

```
disp(' ');
```

```
plot(eigen_IOAMI_COV); % line plot of eigen values of IOAMI
ylabel('Eigen Values','FontSize',14)
xlabel('Eigen Value No','FontSize',14)
legend({'IOAMI in units of Jacobian'},'Location','northwest','FontSize',14)
title({'Eigenspectrum of IOAMI', 'in the units of Jacobian'},'FontSize',14)
grid on % show grid on the plot
set(gca,'FontSize',14)
hold off
```



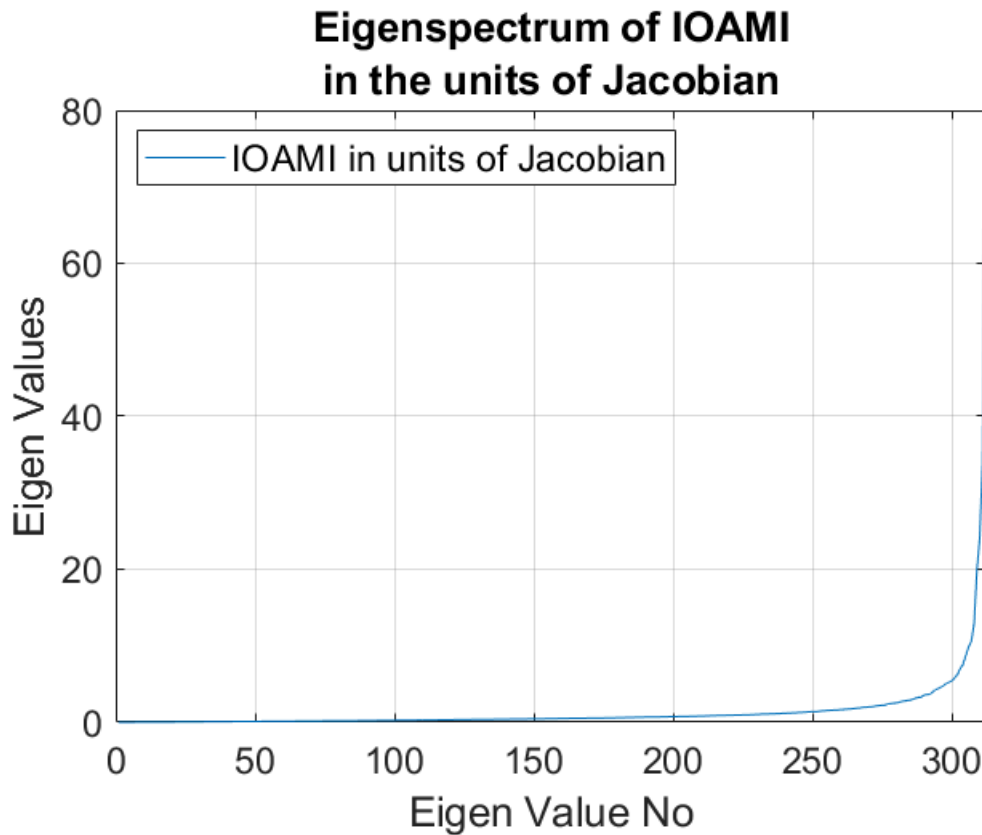

How to construct covariance from IOAMI & JSD correlation Matrix

**Note this is just a hypothetical case of knowing sigma2**

Build NonStationary R covariance

```
sigma2=2;
nonParametric_ioami_covariance=sigma2*IOAMI_COV; % convert correlation to covariance for
```

**Put IOAMI and Jaccard Index Matrix in Cell Array for Checking Time of Observation**

```
% Put Area Stat in Cell Array With Tower Names
tempAreaCover=NaN*ones(size(IOAMI_CORR,1)+2, size(IOAMI_CORR,2)+2);
tempAreaCover(3:end,3:end)=IOAMI_CORR;
tempAreaCover=num2cell(tempAreaCover);
for i=1:size(H,1)
    tempAreaCover{i+2,2}=datestr(obsTimePre(i,2),'yyyymmddHHMM');
    tempAreaCover{2,i+2}=datestr(obsTimePre(i,2),'yyyymmddHHMM');
end
tempAreaCover(3:end,1)=obsTowers(:,1);
tempAreaCover(1,3:end)=obsTowers(:,1)';
tempAreaCover{1,1}='TOWERS';
tempAreaCover{2,2}='TIME';
tempAreaCover{1,2}=[];
tempAreaCover{2,1}=[];
% Empty display to create Gap between Figures and Tables of Matrices
```

```
disp(' ');
```

```
disp(' ');
```

```
disp(' ');
```

```
disp('IOAMI CORRELATION MATRIX SEE VARIABLE TEMP AREA COVER')
```

IOAMI CORRELATION MATRIX SEE VARIABLE TEMP AREA COVER

```
disp(tempAreaCover);
```

Columns 1 through 9

|                |                    |                    |                    |                    |                    |
|----------------|--------------------|--------------------|--------------------|--------------------|--------------------|
| { 'TOWERS' }   | { 0×0 double }     | { 'ONT' }          | { 'ONT' }          | { 'ONT' }          | { 'ONT' }          |
| { 0×0 double } | { 'TIME' }         | { '201510231900' } | { '201510232000' } | { '201510232100' } | { '201510232200' } |
| { 'ONT' }      | { '201510231900' } | { [ 1 ] }          | { [ 0.5234 ] }     | { [ 0.0403 ] }     | { [ 0.0455 ] }     |
| { 'ONT' }      | { '201510232000' } | { [ 0.5234 ] }     | { [ 1 ] }          | { [ 0.0455 ] }     | { [ 0.0554 ] }     |
| { 'ONT' }      | { '201510232100' } | { [ 0.0403 ] }     | { [ 0.0455 ] }     | { [ 1 ] }          | { [ 0.0554 ] }     |
| { 'ONT' }      | { '201510232200' } | { [ 0.0344 ] }     | { [ 0.0365 ] }     | { [ 0.5647 ] }     | { [ 0.0554 ] }     |
| { 'ONT' }      | { '201510232300' } | { [ 0.1573 ] }     | { [ 0.2198 ] }     | { [ 0.0554 ] }     | { [ 0.0554 ] }     |
| { 'ONT' }      | { '201510241900' } | { [ 0.1949 ] }     | { [ 0.1649 ] }     | { [ 0.0330 ] }     | { [ 0.0330 ] }     |
| { 'ONT' }      | { '201510242000' } | { [ 0.2066 ] }     | { [ 0.2131 ] }     | { [ 0.0450 ] }     | { [ 0.0450 ] }     |
| { 'ONT' }      | { '201510242100' } | { [ 0.2462 ] }     | { [ 0.2475 ] }     | { [ 0.0419 ] }     | { [ 0.0419 ] }     |
| { 'ONT' }      | { '201510242200' } | { [ 0.2486 ] }     | { [ 0.3244 ] }     | { [ 0.0558 ] }     | { [ 0.0558 ] }     |
| { 'ONT' }      | { '201510242300' } | { [ 0.2733 ] }     | { [ 0.3752 ] }     | { [ 0.0361 ] }     | { [ 0.0361 ] }     |
| { 'ONT' }      | { '201510251900' } | { [ 0.1947 ] }     | { [ 0.1108 ] }     | { [ 0.0121 ] }     | { [ 0.0121 ] }     |
| { 'ONT' }      | { '201510252000' } | { [ 0.2460 ] }     | { [ 0.1487 ] }     | { [ 0.0141 ] }     | { [ 0.0141 ] }     |
| { 'ONT' }      | { '201510252100' } | { [ 0.2978 ] }     | { [ 0.1656 ] }     | { [ 0.0127 ] }     | { [ 0.0127 ] }     |
| { 'ONT' }      | { '201510252200' } | { [ 0.1068 ] }     | { [ 0.1073 ] }     | { [ 0.0071 ] }     | { [ 0.0071 ] }     |
| { 'ONT' }      | { '201510252300' } | { [ 0.0712 ] }     | { [ 0.0666 ] }     | { [ 0.0054 ] }     | { [ 0.0054 ] }     |
| { 'ONT' }      | { '201510261900' } | { [ 0.2978 ] }     | { [ 0.1853 ] }     | { [ 0.0171 ] }     | { [ 0.0171 ] }     |
| { 'ONT' }      | { '201510262000' } | { [ 0.3320 ] }     | { [ 0.2113 ] }     | { [ 0.0200 ] }     | { [ 0.0200 ] }     |
| { 'ONT' }      | { '201510262100' } | { [ 0.3998 ] }     | { [ 0.2595 ] }     | { [ 0.0180 ] }     | { [ 0.0180 ] }     |
| { 'ONT' }      | { '201510262200' } | { [ 0.2118 ] }     | { [ 0.2124 ] }     | { [ 0.0186 ] }     | { [ 0.0186 ] }     |
| { 'ONT' }      | { '201510262300' } | { [ 0.1742 ] }     | { [ 0.2145 ] }     | { [ 0.0132 ] }     | { [ 0.0132 ] }     |
| { 'ONT' }      | { '201510271900' } | { [ 0.0884 ] }     | { [ 0.0603 ] }     | { [ 0.0039 ] }     | { [ 0.0039 ] }     |
| { 'ONT' }      | { '201510272000' } | { [ 0.1277 ] }     | { [ 0.0957 ] }     | { [ 0.0059 ] }     | { [ 0.0059 ] }     |
| { 'ONT' }      | { '201510272100' } | { [ 0.1234 ] }     | { [ 0.0862 ] }     | { [ 0.0056 ] }     | { [ 0.0056 ] }     |
| { 'ONT' }      | { '201510272200' } | { [ 0.1131 ] }     | { [ 0.0895 ] }     | { [ 0.0081 ] }     | { [ 0.0081 ] }     |
| { 'ONT' }      | { '201510272300' } | { [ 0.0861 ] }     | { [ 0.0809 ] }     | { [ 0.0044 ] }     | { [ 0.0044 ] }     |
| { 'ONT' }      | { '201510281900' } | { [ 0 ] }          | { [ 0 ] }          | { [ 0 ] }          | { [ 0 ] }          |
| { 'ONT' }      | { '201510282000' } | { [ 0 ] }          | { [ 0 ] }          | { [ 0 ] }          | { [ 0 ] }          |
| { 'ONT' }      | { '201510282100' } | { [ 0 ] }          | { [ 0 ] }          | { [ 0 ] }          | { [ 0 ] }          |
| { 'ONT' }      | { '201510282200' } | { [ 0 ] }          | { [ 0 ] }          | { [ 0 ] }          | { [ 0 ] }          |
| { 'ONT' }      | { '201510282300' } | { [ 0 ] }          | { [ 0 ] }          | { [ 0 ] }          | { [ 0 ] }          |
| { 'ONT' }      | { '201510291900' } | { [ 0 ] }          | { [ 0 ] }          | { [ 0 ] }          | { [ 0 ] }          |
| { 'ONT' }      | { '201510292000' } | { [ 0 ] }          | { [ 0 ] }          | { [ 0 ] }          | { [ 0 ] }          |
| { 'ONT' }      | { '201510292100' } | { [ 0 ] }          | { [ 0 ] }          | { [ 0 ] }          | { [ 0 ] }          |
| { 'ONT' }      | { '201510292200' } | { [ 0 ] }          | { [ 0 ] }          | { [ 0 ] }          | { [ 0 ] }          |
| { 'ONT' }      | { '201510292300' } | { [ 0 ] }          | { [ 0 ] }          | { [ 0 ] }          | { [ 0 ] }          |
| { 'ONT' }      | { '201510301900' } | { [ 0 ] }          | { [ 0 ] }          | { [ 0 ] }          | { [ 0 ] }          |
| { 'ONT' }      | { '201510302000' } | { [ 0 ] }          | { [ 0 ] }          | { [ 0 ] }          | { [ 0 ] }          |
| { 'ONT' }      | { '201510302100' } | { [ 0 ] }          | { [ 0 ] }          | { [ 0 ] }          | { [ 0 ] }          |
| { 'ONT' }      | { '201510302200' } | { [ 0 ] }          | { [ 0 ] }          | { [ 0 ] }          | { [ 0 ] }          |
| { 'ONT' }      | { '201510302300' } | { [ 0 ] }          | { [ 0 ] }          | { [ 0 ] }          | { [ 0 ] }          |
| { 'FUL' }      | { '201510231900' } | { [ 0.1041 ] }     | { [ 0.1621 ] }     | { [ 0.0143 ] }     | { [ 0.0143 ] }     |

|           |                    |                    |                    |                    |        |
|-----------|--------------------|--------------------|--------------------|--------------------|--------|
| { 'FUL' } | { '201510232000' } | { [ 0.1074 ] }     | { [ 0.1333 ] }     | { [ 0.0181 ] }     | { [    |
| { 'FUL' } | { '201510232100' } | { [ 0.0746 ] }     | { [ 0.0885 ] }     | { [ 0.0210 ] }     | { [    |
| { 'FUL' } | { '201510232200' } | { [ 0.0281 ] }     | { [ 0.0341 ] }     | { [ 0.0159 ] }     | { [    |
| { 'FUL' } | { '201510232300' } | { [ 0.0306 ] }     | { [ 0.0372 ] }     | { [ 0.0147 ] }     | { [    |
| { 'FUL' } | { '201510241900' } | { [ 0.0643 ] }     | { [ 0.0560 ] }     | { [ 0.0067 ] }     | { [    |
| { 'FUL' } | { '201510242000' } | { [ 0.0559 ] }     | { [ 0.0624 ] }     | { [ 0.0193 ] }     | { [    |
| { 'FUL' } | { '201510242200' } | { [ 0.1306 ] }     | { [ 0.1543 ] }     | { [ 0.0155 ] }     | { [    |
| { 'FUL' } | { '201510242300' } | { [ 0.1405 ] }     | { [ 0.1706 ] }     | { [ 0.0165 ] }     | { [    |
| { 'FUL' } | { '201510251900' } | { [ 0.0061 ] }     | { [ 0.0099 ] }     | { [ 0.0030 ] }     | { [ 1. |
| { 'FUL' } | { '201510252000' } | { [ 0.0062 ] }     | { [ 0.0106 ] }     | { [ 0.0040 ] }     | { [ 1. |
| { 'FUL' } | { '201510252100' } | { [ 0.0027 ] }     | { [ 0.0068 ] }     | { [ 0.0030 ] }     | { [ 5. |
| { 'FUL' } | { '201510252200' } | { [ 0.0031 ] }     | { [ 0.0078 ] }     | { [ 0.0040 ] }     | { [ 3. |
| { 'FUL' } | { '201510252300' } | { [ 0.0045 ] }     | { [ 0.0104 ] }     | { [ 0.0059 ] }     | { [ 3. |
| { 'FUL' } | { '201510261900' } | { [ 0.1538 ] }     | { [ 0.1067 ] }     | { [ 0.0039 ] }     | { [    |
| { 'FUL' } | { '201510262000' } | { [ 0.1760 ] }     | { [ 0.1387 ] }     | { [ 0.0052 ] }     | { [    |
| { 'FUL' } | { '201510262100' } | { [ 0.1515 ] }     | { [ 0.1516 ] }     | { [ 0.0053 ] }     | { [    |
| { 'FUL' } | { '201510262200' } | { [ 0.0915 ] }     | { [ 0.1149 ] }     | { [ 0.0053 ] }     | { [    |
| { 'FUL' } | { '201510262300' } | { [ 0.0459 ] }     | { [ 0.0608 ] }     | { [ 0.0067 ] }     | { [    |
| { 'FUL' } | { '201510271900' } | { [ 0.0345 ] }     | { [ 0.0419 ] }     | { [ 0.0022 ] }     | { [ 1. |
| { 'FUL' } | { '201510272000' } | { [ 0.0385 ] }     | { [ 0.0482 ] }     | { [ 0.0031 ] }     | { [ 3. |
| { 'FUL' } | { '201510272100' } | { [ 0.0165 ] }     | { [ 0.0202 ] }     | { [ 0.0028 ] }     | { [ 6. |
| { 'FUL' } | { '201510272200' } | { [ 0.0012 ] }     | { [ 0.0018 ] }     | { [ 8.7271e-04 ] } | { [    |
| { 'FUL' } | { '201510272300' } | { [ 0.0026 ] }     | { [ 0.0037 ] }     | { [ 0.0014 ] }     | { [    |
| { 'FUL' } | { '201510281900' } | { [ 0 ] }          | { [ 0 ] }          | { [ 0 ] }          | { [    |
| { 'FUL' } | { '201510282000' } | { [ 0 ] }          | { [ 0 ] }          | { [ 0 ] }          | { [    |
| { 'FUL' } | { '201510282100' } | { [ 0 ] }          | { [ 0 ] }          | { [ 0 ] }          | { [    |
| { 'FUL' } | { '201510282200' } | { [ 0 ] }          | { [ 0 ] }          | { [ 0 ] }          | { [    |
| { 'FUL' } | { '201510282300' } | { [ 0 ] }          | { [ 0 ] }          | { [ 0 ] }          | { [    |
| { 'FUL' } | { '201510291900' } | { [ 0 ] }          | { [ 0 ] }          | { [ 0 ] }          | { [    |
| { 'FUL' } | { '201510292000' } | { [ 0 ] }          | { [ 0 ] }          | { [ 0 ] }          | { [    |
| { 'FUL' } | { '201510292100' } | { [ 0 ] }          | { [ 0 ] }          | { [ 0 ] }          | { [    |
| { 'FUL' } | { '201510292200' } | { [ 0 ] }          | { [ 0 ] }          | { [ 0 ] }          | { [    |
| { 'FUL' } | { '201510292300' } | { [ 0 ] }          | { [ 0 ] }          | { [ 0 ] }          | { [    |
| { 'FUL' } | { '201510301900' } | { [ 0 ] }          | { [ 0 ] }          | { [ 0 ] }          | { [    |
| { 'FUL' } | { '201510302000' } | { [ 0 ] }          | { [ 0 ] }          | { [ 0 ] }          | { [    |
| { 'FUL' } | { '201510302200' } | { [ 0 ] }          | { [ 0 ] }          | { [ 0 ] }          | { [    |
| { 'FUL' } | { '201510302300' } | { [ 0 ] }          | { [ 0 ] }          | { [ 0 ] }          | { [    |
| { 'CMP' } | { '201510231900' } | { [ 4.6581e-04 ] } | { [ 3.8095e-04 ] } | { [ 9.0052e-04 ] } | { [ 1. |
| { 'CMP' } | { '201510232000' } | { [ 0.0119 ] }     | { [ 0.0136 ] }     | { [ 0.0134 ] }     | { [    |
| { 'CMP' } | { '201510232100' } | { [ 0.0124 ] }     | { [ 0.0148 ] }     | { [ 0.0117 ] }     | { [ 8. |
| { 'CMP' } | { '201510232200' } | { [ 0.0126 ] }     | { [ 0.0161 ] }     | { [ 0.0100 ] }     | { [ 4. |
| { 'CMP' } | { '201510232300' } | { [ 0.0168 ] }     | { [ 0.0214 ] }     | { [ 0.0139 ] }     | { [    |
| { 'CMP' } | { '201510241900' } | { [ 0.2044 ] }     | { [ 0.1578 ] }     | { [ 0.0099 ] }     | { [    |
| { 'CMP' } | { '201510242000' } | { [ 0.1823 ] }     | { [ 0.1498 ] }     | { [ 0.0097 ] }     | { [    |
| { 'CMP' } | { '201510242100' } | { [ 0.1461 ] }     | { [ 0.1567 ] }     | { [ 0.0097 ] }     | { [    |
| { 'CMP' } | { '201510242200' } | { [ 0.1154 ] }     | { [ 0.1444 ] }     | { [ 0.0088 ] }     | { [    |
| { 'CMP' } | { '201510242300' } | { [ 0.1212 ] }     | { [ 0.1551 ] }     | { [ 0.0114 ] }     | { [    |
| { 'CMP' } | { '201510251900' } | { [ 0.0031 ] }     | { [ 0.0066 ] }     | { [ 0.0025 ] }     | { [    |
| { 'CMP' } | { '201510252000' } | { [ 0.0030 ] }     | { [ 0.0069 ] }     | { [ 0.0037 ] }     | { [ 5. |
| { 'CMP' } | { '201510252100' } | { [ 0.0049 ] }     | { [ 0.0093 ] }     | { [ 0.0069 ] }     | { [ 5. |
| { 'CMP' } | { '201510252200' } | { [ 0.0017 ] }     | { [ 0.0055 ] }     | { [ 0.0030 ] }     | { [    |
| { 'CMP' } | { '201510252300' } | { [ 0.0034 ] }     | { [ 0.0074 ] }     | { [ 0.0072 ] }     | { [ 1. |
| { 'CMP' } | { '201510261900' } | { [ 0.0845 ] }     | { [ 0.1271 ] }     | { [ 0.0068 ] }     | { [    |
| { 'CMP' } | { '201510262000' } | { [ 0.0797 ] }     | { [ 0.1230 ] }     | { [ 0.0080 ] }     | { [    |
| { 'CMP' } | { '201510262100' } | { [ 0.0447 ] }     | { [ 0.0647 ] }     | { [ 0.0063 ] }     | { [ 5. |
| { 'CMP' } | { '201510262200' } | { [ 0.0357 ] }     | { [ 0.0427 ] }     | { [ 0.0059 ] }     | { [ 1. |
| { 'CMP' } | { '201510262300' } | { [ 0.0071 ] }     | { [ 0.0084 ] }     | { [ 0.0140 ] }     | { [ 1. |
| { 'CMP' } | { '201510271900' } | { [ 6.8869e-04 ] } | { [ 0.0014 ] }     | { [ 5.2265e-04 ] } | { [    |
| { 'CMP' } | { '201510272000' } | { [ 0.0018 ] }     | { [ 0.0026 ] }     | { [ 0.0041 ] }     | { [    |
| { 'CMP' } | { '201510272100' } | { [ 0 ] }          | { [ 1.6343e-04 ] } | { [ 0 ] }          | { [    |
| { 'CMP' } | { '201510272200' } | { [ 0 ] }          | { [ 0 ] }          | { [ 0 ] }          | { [    |
| { 'CMP' } | { '201510272300' } | { [ 0.0138 ] }     | { [ 0.0176 ] }     | { [ 0.0097 ] }     | { [ 4. |
| { 'CMP' } | { '201510281900' } | { [ 0 ] }          | { [ 0 ] }          | { [ 0 ] }          | { [    |
| { 'CMP' } | { '201510282000' } | { [ 0 ] }          | { [ 0 ] }          | { [ 0 ] }          | { [    |
| { 'CMP' } | { '201510282100' } | { [ 0 ] }          | { [ 0 ] }          | { [ 0 ] }          | { [    |

|           |                    |                    |                    |                    |            |
|-----------|--------------------|--------------------|--------------------|--------------------|------------|
| { 'CMP' } | { '201510282200' } | { [ 0 ] }          | { [ 0 ] }          | { [ 0 ] }          | { [ 0 ] }  |
| { 'CMP' } | { '201510282300' } | { [ 0 ] }          | { [ 0 ] }          | { [ 0 ] }          | { [ 0 ] }  |
| { 'CMP' } | { '201510291900' } | { [ 0 ] }          | { [ 0 ] }          | { [ 0 ] }          | { [ 0 ] }  |
| { 'CMP' } | { '201510292000' } | { [ 0 ] }          | { [ 0 ] }          | { [ 0 ] }          | { [ 0 ] }  |
| { 'CMP' } | { '201510292100' } | { [ 0 ] }          | { [ 0 ] }          | { [ 0 ] }          | { [ 0 ] }  |
| { 'CMP' } | { '201510292200' } | { [ 0 ] }          | { [ 0 ] }          | { [ 0 ] }          | { [ 0 ] }  |
| { 'CMP' } | { '201510292300' } | { [ 0 ] }          | { [ 0 ] }          | { [ 0 ] }          | { [ 0 ] }  |
| { 'CMP' } | { '201510301900' } | { [ 0 ] }          | { [ 0 ] }          | { [ 0 ] }          | { [ 0 ] }  |
| { 'CMP' } | { '201510302000' } | { [ 0 ] }          | { [ 0 ] }          | { [ 0 ] }          | { [ 0 ] }  |
| { 'CMP' } | { '201510302100' } | { [ 0 ] }          | { [ 0 ] }          | { [ 0 ] }          | { [ 0 ] }  |
| { 'CMP' } | { '201510302200' } | { [ 0 ] }          | { [ 0 ] }          | { [ 0 ] }          | { [ 0 ] }  |
| { 'CMP' } | { '201510302300' } | { [ 0 ] }          | { [ 0 ] }          | { [ 0 ] }          | { [ 0 ] }  |
| { 'GRA' } | { '201510231900' } | { [ 5.9828e-04 ] } | { [ 2.8943e-04 ] } | { [ 5.9954e-04 ] } | { [ 2. ] } |
| { 'GRA' } | { '201510232000' } | { [ 6.0633e-04 ] } | { [ 2.9421e-04 ] } | { [ 6.7267e-04 ] } | { [ 2. ] } |
| { 'GRA' } | { '201510232100' } | { [ 6.1732e-04 ] } | { [ 3.0079e-04 ] } | { [ 8.0203e-04 ] } | { [ 3. ] } |
| { 'GRA' } | { '201510232200' } | { [ 1.1156e-04 ] } | { [ 7.6854e-05 ] } | { [ 6.7029e-04 ] } | { [ 3. ] } |
| { 'GRA' } | { '201510232300' } | { [ 5.1661e-05 ] } | { [ 1.0895e-05 ] } | { [ 9.4265e-05 ] } | { [ 9. ] } |
| { 'GRA' } | { '201510241900' } | { [ 0.0030 ] }     | { [ 0.0035 ] }     | { [ 0.0031 ] }     | { [ 8. ] } |
| { 'GRA' } | { '201510242000' } | { [ 0.0041 ] }     | { [ 0.0052 ] }     | { [ 0.0072 ] }     | { [ 2. ] } |
| { 'GRA' } | { '201510242100' } | { [ 0.0161 ] }     | { [ 0.0226 ] }     | { [ 0.0141 ] }     | { [ 0. ] } |
| { 'GRA' } | { '201510242200' } | { [ 0.0131 ] }     | { [ 0.0175 ] }     | { [ 0.0159 ] }     | { [ 0. ] } |
| { 'GRA' } | { '201510242300' } | { [ 0.0077 ] }     | { [ 0.0103 ] }     | { [ 0.0105 ] }     | { [ 5. ] } |
| { 'GRA' } | { '201510251900' } | { [ 0.1565 ] }     | { [ 0.1672 ] }     | { [ 0.0070 ] }     | { [ 0. ] } |
| { 'GRA' } | { '201510252000' } | { [ 0.1095 ] }     | { [ 0.1277 ] }     | { [ 0.0062 ] }     | { [ 0. ] } |
| { 'GRA' } | { '201510252100' } | { [ 0.0613 ] }     | { [ 0.0807 ] }     | { [ 0.0042 ] }     | { [ 4. ] } |
| { 'GRA' } | { '201510252200' } | { [ 0.0241 ] }     | { [ 0.0387 ] }     | { [ 0.0052 ] }     | { [ 1. ] } |
| { 'GRA' } | { '201510252300' } | { [ 0.0052 ] }     | { [ 0.0090 ] }     | { [ 0.0051 ] }     | { [ 1. ] } |
| { 'GRA' } | { '201510261900' } | { [ 0.0062 ] }     | { [ 0.0077 ] }     | { [ 0.0031 ] }     | { [ 2. ] } |
| { 'GRA' } | { '201510262000' } | { [ 0.0048 ] }     | { [ 0.0054 ] }     | { [ 0.0033 ] }     | { [ 3. ] } |
| { 'GRA' } | { '201510262100' } | { [ 9.9626e-04 ] } | { [ 9.8522e-04 ] } | { [ 0.0020 ] }     | { [ 5. ] } |
| { 'GRA' } | { '201510262200' } | { [ 0.0109 ] }     | { [ 0.0135 ] }     | { [ 0.0072 ] }     | { [ 3. ] } |
| { 'GRA' } | { '201510262300' } | { [ 3.1655e-04 ] } | { [ 2.1376e-04 ] } | { [ 3.0050e-04 ] } | { [ 1. ] } |
| { 'GRA' } | { '201510271900' } | { [ 0.0904 ] }     | { [ 0.1106 ] }     | { [ 0.0077 ] }     | { [ 0. ] } |
| { 'GRA' } | { '201510272000' } | { [ 0.0686 ] }     | { [ 0.0938 ] }     | { [ 0.0071 ] }     | { [ 0. ] } |
| { 'GRA' } | { '201510272100' } | { [ 0.0600 ] }     | { [ 0.0723 ] }     | { [ 0.0071 ] }     | { [ 0. ] } |
| { 'GRA' } | { '201510272200' } | { [ 0.0506 ] }     | { [ 0.0608 ] }     | { [ 0.0073 ] }     | { [ 0. ] } |
| { 'GRA' } | { '201510272300' } | { [ 0.0346 ] }     | { [ 0.0422 ] }     | { [ 0.0076 ] }     | { [ 0. ] } |
| { 'GRA' } | { '201510281900' } | { [ 0 ] }          | { [ 0 ] }          | { [ 0 ] }          | { [ 0. ] } |
| { 'GRA' } | { '201510282000' } | { [ 0 ] }          | { [ 0 ] }          | { [ 0 ] }          | { [ 0. ] } |
| { 'GRA' } | { '201510282100' } | { [ 0 ] }          | { [ 0 ] }          | { [ 0 ] }          | { [ 0. ] } |
| { 'GRA' } | { '201510282200' } | { [ 0 ] }          | { [ 0 ] }          | { [ 0 ] }          | { [ 0. ] } |
| { 'GRA' } | { '201510282300' } | { [ 0 ] }          | { [ 0 ] }          | { [ 0 ] }          | { [ 0. ] } |
| { 'GRA' } | { '201510291900' } | { [ 0 ] }          | { [ 0 ] }          | { [ 0 ] }          | { [ 0. ] } |
| { 'GRA' } | { '201510292000' } | { [ 0 ] }          | { [ 0 ] }          | { [ 0 ] }          | { [ 0. ] } |
| { 'GRA' } | { '201510292100' } | { [ 0 ] }          | { [ 0 ] }          | { [ 0 ] }          | { [ 0. ] } |
| { 'GRA' } | { '201510292200' } | { [ 0 ] }          | { [ 0 ] }          | { [ 0 ] }          | { [ 0. ] } |
| { 'GRA' } | { '201510292300' } | { [ 0 ] }          | { [ 0 ] }          | { [ 0 ] }          | { [ 0. ] } |
| { 'GRA' } | { '201510301900' } | { [ 0 ] }          | { [ 0 ] }          | { [ 0 ] }          | { [ 0. ] } |
| { 'GRA' } | { '201510302000' } | { [ 0 ] }          | { [ 0 ] }          | { [ 0 ] }          | { [ 0. ] } |
| { 'GRA' } | { '201510302100' } | { [ 0 ] }          | { [ 0 ] }          | { [ 0 ] }          | { [ 0. ] } |
| { 'GRA' } | { '201510302200' } | { [ 0 ] }          | { [ 0 ] }          | { [ 0 ] }          | { [ 0. ] } |
| { 'GRA' } | { '201510302300' } | { [ 0 ] }          | { [ 0 ] }          | { [ 0 ] }          | { [ 0. ] } |
| { 'USC' } | { '201510231900' } | { [ 0.0021 ] }     | { [ 0.0025 ] }     | { [ 0.0018 ] }     | { [ 6. ] } |
| { 'USC' } | { '201510232000' } | { [ 0.0065 ] }     | { [ 0.0076 ] }     | { [ 0.0032 ] }     | { [ 2. ] } |
| { 'USC' } | { '201510232100' } | { [ 0.0173 ] }     | { [ 0.0306 ] }     | { [ 0.0052 ] }     | { [ 3. ] } |
| { 'USC' } | { '201510232200' } | { [ 0.0133 ] }     | { [ 0.0165 ] }     | { [ 0.0059 ] }     | { [ 5. ] } |
| { 'USC' } | { '201510232300' } | { [ 0.0092 ] }     | { [ 0.0120 ] }     | { [ 0.0078 ] }     | { [ 1. ] } |
| { 'USC' } | { '201510241900' } | { [ 0.1504 ] }     | { [ 0.1860 ] }     | { [ 0.0117 ] }     | { [ 0. ] } |
| { 'USC' } | { '201510242000' } | { [ 0.1843 ] }     | { [ 0.2105 ] }     | { [ 0.0168 ] }     | { [ 0. ] } |
| { 'USC' } | { '201510242100' } | { [ 0.2298 ] }     | { [ 0.2644 ] }     | { [ 0.0186 ] }     | { [ 0. ] } |
| { 'USC' } | { '201510242200' } | { [ 0.1688 ] }     | { [ 0.1945 ] }     | { [ 0.0135 ] }     | { [ 0. ] } |
| { 'USC' } | { '201510242300' } | { [ 0.1012 ] }     | { [ 0.1254 ] }     | { [ 0.0092 ] }     | { [ 0. ] } |
| { 'USC' } | { '201510251900' } | { [ 0.0119 ] }     | { [ 0.0161 ] }     | { [ 0.0026 ] }     | { [ 5. ] } |
| { 'USC' } | { '201510252000' } | { [ 0.0061 ] }     | { [ 0.0092 ] }     | { [ 0.0029 ] }     | { [ 4. ] } |
| { 'USC' } | { '201510252200' } | { [ 0.0051 ] }     | { [ 0.0084 ] }     | { [ 0.0038 ] }     | { [ 7. ] } |

|           |                    |                    |                    |                    |        |
|-----------|--------------------|--------------------|--------------------|--------------------|--------|
| { 'USC' } | { '201510252300' } | { [ 0.0058 ] }     | { [ 0.0097 ] }     | { [ 0.0053 ] }     | { [ 9. |
| { 'USC' } | { '201510261900' } | { [ 0.1796 ] }     | { [ 0.1889 ] }     | { [ 0.0120 ] }     | { [    |
| { 'USC' } | { '201510262000' } | { [ 0.0961 ] }     | { [ 0.1183 ] }     | { [ 0.0101 ] }     | { [    |
| { 'USC' } | { '201510262100' } | { [ 0.0490 ] }     | { [ 0.0750 ] }     | { [ 0.0070 ] }     | { [    |
| { 'USC' } | { '201510262200' } | { [ 0.0431 ] }     | { [ 0.0557 ] }     | { [ 0.0080 ] }     | { [ 5. |
| { 'USC' } | { '201510262300' } | { [ 0.0102 ] }     | { [ 0.0135 ] }     | { [ 0.0132 ] }     | { [ 1. |
| { 'USC' } | { '201510271900' } | { [ 0.0296 ] }     | { [ 0.0362 ] }     | { [ 0.0048 ] }     | { [ 5. |
| { 'USC' } | { '201510272000' } | { [ 6.0010e-04 ] } | { [ 9.9285e-04 ] } | { [ 3.2664e-04 ] } | { [    |
| { 'USC' } | { '201510272100' } | { [ 3.4784e-04 ] } | { [ 5.5144e-04 ] } | { [ 8.1082e-04 ] } | { [    |
| { 'USC' } | { '201510272200' } | { [ 2.3240e-04 ] } | { [ 4.1130e-04 ] } | { [ 6.7822e-04 ] } | { [    |
| { 'USC' } | { '201510272300' } | { [ 0.0253 ] }     | { [ 0.0296 ] }     | { [ 0.0053 ] }     | { [ 2. |
| { 'USC' } | { '201510281900' } | { [ 0 ] }          | { [ 0 ] }          | { [ 0 ] }          | { [    |
| { 'USC' } | { '201510282000' } | { [ 0 ] }          | { [ 0 ] }          | { [ 0 ] }          | { [    |
| { 'USC' } | { '201510282100' } | { [ 0 ] }          | { [ 0 ] }          | { [ 0 ] }          | { [    |
| { 'USC' } | { '201510282200' } | { [ 0 ] }          | { [ 0 ] }          | { [ 0 ] }          | { [    |
| { 'USC' } | { '201510282300' } | { [ 0 ] }          | { [ 0 ] }          | { [ 0 ] }          | { [    |
| { 'USC' } | { '201510291900' } | { [ 0 ] }          | { [ 0 ] }          | { [ 0 ] }          | { [    |
| { 'USC' } | { '201510292100' } | { [ 0 ] }          | { [ 0 ] }          | { [ 0 ] }          | { [    |
| { 'USC' } | { '201510292200' } | { [ 0 ] }          | { [ 0 ] }          | { [ 0 ] }          | { [    |
| { 'USC' } | { '201510292300' } | { [ 0 ] }          | { [ 0 ] }          | { [ 0 ] }          | { [    |
| { 'USC' } | { '201510301900' } | { [ 0 ] }          | { [ 0 ] }          | { [ 0 ] }          | { [    |
| { 'USC' } | { '201510302000' } | { [ 0 ] }          | { [ 0 ] }          | { [ 0 ] }          | { [    |
| { 'USC' } | { '201510302100' } | { [ 0 ] }          | { [ 0 ] }          | { [ 0 ] }          | { [    |
| { 'USC' } | { '201510302200' } | { [ 0 ] }          | { [ 0 ] }          | { [ 0 ] }          | { [    |
| { 'USC' } | { '201510302300' } | { [ 0 ] }          | { [ 0 ] }          | { [ 0 ] }          | { [    |
| { 'UCI' } | { '201510232000' } | { [ 0.2387 ] }     | { [ 0.2543 ] }     | { [ 0.0175 ] }     | { [    |
| { 'UCI' } | { '201510232100' } | { [ 0.1918 ] }     | { [ 0.2011 ] }     | { [ 0.0171 ] }     | { [    |
| { 'UCI' } | { '201510232200' } | { [ 0.1484 ] }     | { [ 0.1780 ] }     | { [ 0.0186 ] }     | { [    |
| { 'UCI' } | { '201510232300' } | { [ 0.1316 ] }     | { [ 0.1496 ] }     | { [ 0.0207 ] }     | { [    |
| { 'UCI' } | { '201510241900' } | { [ 0.0792 ] }     | { [ 0.1067 ] }     | { [ 0.0056 ] }     | { [    |
| { 'UCI' } | { '201510242000' } | { [ 0.1062 ] }     | { [ 0.1402 ] }     | { [ 0.0084 ] }     | { [    |
| { 'UCI' } | { '201510242100' } | { [ 0.0944 ] }     | { [ 0.1252 ] }     | { [ 0.0079 ] }     | { [    |
| { 'UCI' } | { '201510242200' } | { [ 0.1042 ] }     | { [ 0.1369 ] }     | { [ 0.0110 ] }     | { [    |
| { 'UCI' } | { '201510242300' } | { [ 0.0731 ] }     | { [ 0.1006 ] }     | { [ 0.0117 ] }     | { [    |
| { 'UCI' } | { '201510251900' } | { [ 0.0019 ] }     | { [ 0.0054 ] }     | { [ 0.0030 ] }     | { [    |
| { 'UCI' } | { '201510252000' } | { [ 0.0021 ] }     | { [ 0.0058 ] }     | { [ 0.0054 ] }     | { [ 1. |
| { 'UCI' } | { '201510252100' } | { [ 0.0036 ] }     | { [ 0.0083 ] }     | { [ 0.0104 ] }     | { [ 1. |
| { 'UCI' } | { '201510252200' } | { [ 0.0019 ] }     | { [ 0.0043 ] }     | { [ 0.0058 ] }     | { [    |
| { 'UCI' } | { '201510252300' } | { [ 0.0011 ] }     | { [ 0.0050 ] }     | { [ 0.0050 ] }     | { [ 5. |
| { 'UCI' } | { '201510261900' } | { [ 0.1093 ] }     | { [ 0.1049 ] }     | { [ 0.0034 ] }     | { [ 5. |
| { 'UCI' } | { '201510262000' } | { [ 0.0937 ] }     | { [ 0.1078 ] }     | { [ 0.0038 ] }     | { [ 2. |
| { 'UCI' } | { '201510262100' } | { [ 0.0521 ] }     | { [ 0.0679 ] }     | { [ 0.0077 ] }     | { [ 4. |
| { 'UCI' } | { '201510262200' } | { [ 0.0267 ] }     | { [ 0.0325 ] }     | { [ 0.0083 ] }     | { [ 4. |
| { 'UCI' } | { '201510262300' } | { [ 0.0318 ] }     | { [ 0.0376 ] }     | { [ 0.0083 ] }     | { [    |
| { 'UCI' } | { '201510271900' } | { [ 0.0130 ] }     | { [ 0.0191 ] }     | { [ 0.0011 ] }     | { [    |
| { 'UCI' } | { '201510272000' } | { [ 0.0208 ] }     | { [ 0.0288 ] }     | { [ 0.0017 ] }     | { [ 3. |
| { 'UCI' } | { '201510272100' } | { [ 0.0035 ] }     | { [ 0.0049 ] }     | { [ 0.0012 ] }     | { [    |
| { 'UCI' } | { '201510272200' } | { [ 0.0014 ] }     | { [ 0.0024 ] }     | { [ 0.0045 ] }     | { [    |
| { 'UCI' } | { '201510272300' } | { [ 0 ] }          | { [ 0 ] }          | { [ 0 ] }          | { [    |
| { 'UCI' } | { '201510281900' } | { [ 0 ] }          | { [ 0 ] }          | { [ 0 ] }          | { [    |
| { 'UCI' } | { '201510282000' } | { [ 0 ] }          | { [ 0 ] }          | { [ 0 ] }          | { [    |
| { 'UCI' } | { '201510282100' } | { [ 0 ] }          | { [ 0 ] }          | { [ 0 ] }          | { [    |
| { 'UCI' } | { '201510282200' } | { [ 0 ] }          | { [ 0 ] }          | { [ 0 ] }          | { [    |
| { 'UCI' } | { '201510282300' } | { [ 0 ] }          | { [ 0 ] }          | { [ 0 ] }          | { [    |
| { 'UCI' } | { '201510291900' } | { [ 0 ] }          | { [ 0 ] }          | { [ 0 ] }          | { [    |
| { 'UCI' } | { '201510292000' } | { [ 0 ] }          | { [ 0 ] }          | { [ 0 ] }          | { [    |
| { 'UCI' } | { '201510292100' } | { [ 0 ] }          | { [ 0 ] }          | { [ 0 ] }          | { [    |
| { 'UCI' } | { '201510292200' } | { [ 0 ] }          | { [ 0 ] }          | { [ 0 ] }          | { [    |
| { 'UCI' } | { '201510292300' } | { [ 0 ] }          | { [ 0 ] }          | { [ 0 ] }          | { [    |
| { 'UCI' } | { '201510301900' } | { [ 0 ] }          | { [ 0 ] }          | { [ 0 ] }          | { [    |
| { 'UCI' } | { '201510302000' } | { [ 0 ] }          | { [ 0 ] }          | { [ 0 ] }          | { [    |
| { 'UCI' } | { '201510302100' } | { [ 0 ] }          | { [ 0 ] }          | { [ 0 ] }          | { [    |
| { 'UCI' } | { '201510302200' } | { [ 0 ] }          | { [ 0 ] }          | { [ 0 ] }          | { [    |
| { 'UCI' } | { '201510302300' } | { [ 0 ] }          | { [ 0 ] }          | { [ 0 ] }          | { [    |
| { 'PSA' } | { '201510231900' } | { [ 0.0289 ] }     | { [ 0.0432 ] }     | { [ 0.0039 ] }     | { [ 7. |

|           |                    |               |               |                   |        |
|-----------|--------------------|---------------|---------------|-------------------|--------|
| { 'PSA' } | { '201510232000' } | { [ 0.0266] } | { [ 0.0409] } | { [ 0.0046] }     | { [ 1. |
| { 'PSA' } | { '201510232100' } | { [ 0.0244] } | { [ 0.0381] } | { [ 0.0037] }     | { [ 7. |
| { 'PSA' } | { '201510232200' } | { [ 0.0390] } | { [ 0.0644] } | { [ 0.0079] }     | { [ 6. |
| { 'PSA' } | { '201510232300' } | { [ 0.0172] } | { [ 0.0206] } | { [ 0.0050] }     | { [ 9. |
| { 'PSA' } | { '201510241900' } | { [ 0.1660] } | { [ 0.1986] } | { [ 0.0121] }     | { [    |
| { 'PSA' } | { '201510242000' } | { [ 0.0866] } | { [ 0.1247] } | { [ 0.0133] }     | { [    |
| { 'PSA' } | { '201510242100' } | { [ 0.0803] } | { [ 0.1096] } | { [ 0.0190] }     | { [    |
| { 'PSA' } | { '201510242200' } | { [ 0.0643] } | { [ 0.0805] } | { [ 0.0191] }     | { [    |
| { 'PSA' } | { '201510242300' } | { [ 0.1043] } | { [ 0.1273] } | { [ 0.0196] }     | { [    |
| { 'PSA' } | { '201510251900' } | { [ 0.0881] } | { [ 0.1006] } | { [ 0.0033] }     | { [    |
| { 'PSA' } | { '201510252000' } | { [ 0.0580] } | { [ 0.0759] } | { [ 0.0041] }     | { [ 8. |
| { 'PSA' } | { '201510252100' } | { [ 0.0335] } | { [ 0.0497] } | { [ 0.0039] }     | { [ 2. |
| { 'PSA' } | { '201510252200' } | { [ 0.0329] } | { [ 0.0497] } | { [ 0.0045] }     | { [ 4. |
| { 'PSA' } | { '201510252300' } | { [ 0.0082] } | { [ 0.0147] } | { [ 0.0047] }     | { [ 1. |
| { 'PSA' } | { '201510261900' } | { [ 0.2520] } | { [ 0.3062] } | { [ 0.0201] }     | { [    |
| { 'PSA' } | { '201510262000' } | { [ 0.2555] } | { [ 0.2808] } | { [ 0.0193] }     | { [    |
| { 'PSA' } | { '201510262100' } | { [ 0.1890] } | { [ 0.1827] } | { [ 0.0146] }     | { [    |
| { 'PSA' } | { '201510262200' } | { [ 0.0289] } | { [ 0.0333] } | { [ 0.0059] }     | { [ 6. |
| { 'PSA' } | { '201510262300' } | { [ 0.0186] } | { [ 0.0225] } | { [ 0.0055] }     | { [ 4. |
| { 'PSA' } | { '201510271900' } | { [ 0.1148] } | { [ 0.1326] } | { [ 0.0068] }     | { [    |
| { 'PSA' } | { '201510272000' } | { [ 0.1069] } | { [ 0.1260] } | { [ 0.0080] }     | { [    |
| { 'PSA' } | { '201510272100' } | { [ 0.0504] } | { [ 0.0667] } | { [ 0.0058] }     | { [    |
| { 'PSA' } | { '201510272200' } | { [ 0.0452] } | { [ 0.0565] } | { [ 0.0069] }     | { [    |
| { 'PSA' } | { '201510272300' } | { [ 0.0044] } | { [ 0.0059] } | { [ 0.0046] }     | { [ 1. |
| { 'PSA' } | { '201510281900' } | { [ 0] }      | { [ 0] }      | { [ 0] }          | { [    |
| { 'PSA' } | { '201510282000' } | { [ 0] }      | { [ 0] }      | { [ 0] }          | { [    |
| { 'PSA' } | { '201510282100' } | { [ 0] }      | { [ 0] }      | { [ 0] }          | { [    |
| { 'PSA' } | { '201510282200' } | { [ 0] }      | { [ 0] }      | { [ 0] }          | { [    |
| { 'PSA' } | { '201510282300' } | { [ 0] }      | { [ 0] }      | { [ 0] }          | { [    |
| { 'PSA' } | { '201510291900' } | { [ 0] }      | { [ 0] }      | { [ 0] }          | { [    |
| { 'PSA' } | { '201510292000' } | { [ 0] }      | { [ 0] }      | { [ 0] }          | { [    |
| { 'PSA' } | { '201510292100' } | { [ 0] }      | { [ 0] }      | { [ 0] }          | { [    |
| { 'PSA' } | { '201510292200' } | { [ 0] }      | { [ 0] }      | { [ 0] }          | { [    |
| { 'PSA' } | { '201510292300' } | { [ 0] }      | { [ 0] }      | { [ 0] }          | { [    |
| { 'PSA' } | { '201510301900' } | { [ 0] }      | { [ 0] }      | { [ 0] }          | { [    |
| { 'PSA' } | { '201510302000' } | { [ 0] }      | { [ 0] }      | { [ 0] }          | { [    |
| { 'PSA' } | { '201510302100' } | { [ 0] }      | { [ 0] }      | { [ 0] }          | { [    |
| { 'PSA' } | { '201510302200' } | { [ 0] }      | { [ 0] }      | { [ 0] }          | { [    |
| { 'PSA' } | { '201510302300' } | { [ 0] }      | { [ 0] }      | { [ 0] }          | { [    |
| { 'BND' } | { '201510231900' } | { [ 0.0416] } | { [ 0.0197] } | { [ 0.0073] }     | { [ 6. |
| { 'BND' } | { '201510232000' } | { [ 0.1033] } | { [ 0.0495] } | { [ 0.0060] }     | { [    |
| { 'BND' } | { '201510232100' } | { [ 0.0134] } | { [ 0.0054] } | { [ 3.7288e-04] } | { [ 6. |
| { 'BND' } | { '201510232200' } | { [ 0.0144] } | { [ 0.0065] } | { [ 0.0016] }     | { [ 1. |
| { 'BND' } | { '201510241900' } | { [ 0.1006] } | { [ 0.0429] } | { [ 0.0059] }     | { [    |
| { 'BND' } | { '201510242000' } | { [ 0.0814] } | { [ 0.0401] } | { [ 0.0054] }     | { [    |
| { 'BND' } | { '201510242100' } | { [ 0.0571] } | { [ 0.0338] } | { [ 0.0053] }     | { [    |
| { 'BND' } | { '201510242200' } | { [ 0.0674] } | { [ 0.0422] } | { [ 0.0096] }     | { [    |
| { 'BND' } | { '201510242300' } | { [ 0.0837] } | { [ 0.0433] } | { [ 0.0118] }     | { [    |
| { 'BND' } | { '201510251900' } | { [ 0.1448] } | { [ 0.0997] } | { [ 0.0156] }     | { [    |
| { 'BND' } | { '201510252000' } | { [ 0.0960] } | { [ 0.0500] } | { [ 0.0064] }     | { [    |
| { 'BND' } | { '201510252100' } | { [ 0.0695] } | { [ 0.0277] } | { [ 0.0028] }     | { [ 2. |
| { 'BND' } | { '201510252200' } | { [ 0.0909] } | { [ 0.0551] } | { [ 0.0031] }     | { [ 3. |
| { 'BND' } | { '201510252300' } | { [ 0.1565] } | { [ 0.1035] } | { [ 0.0058] }     | { [ 8. |
| { 'BND' } | { '201510261900' } | { [ 0.2304] } | { [ 0.1717] } | { [ 0.0361] }     | { [    |
| { 'BND' } | { '201510262000' } | { [ 0.2133] } | { [ 0.1618] } | { [ 0.0395] }     | { [    |
| { 'BND' } | { '201510262100' } | { [ 0.2531] } | { [ 0.1625] } | { [ 0.0209] }     | { [    |
| { 'BND' } | { '201510262200' } | { [ 0.2804] } | { [ 0.1989] } | { [ 0.0201] }     | { [    |
| { 'BND' } | { '201510262300' } | { [ 0.2962] } | { [ 0.2331] } | { [ 0.0204] }     | { [    |
| { 'BND' } | { '201510271900' } | { [ 0.0517] } | { [ 0.0449] } | { [ 0.0030] }     | { [ 4. |
| { 'BND' } | { '201510272000' } | { [ 0.0392] } | { [ 0.0412] } | { [ 0.0034] }     | { [ 5. |
| { 'BND' } | { '201510272100' } | { [ 0.0398] } | { [ 0.0471] } | { [ 0.0058] }     | { [ 9. |
| { 'BND' } | { '201510272200' } | { [ 0.0629] } | { [ 0.0448] } | { [ 0.0040] }     | { [ 2. |
| { 'BND' } | { '201510272300' } | { [ 0.0387] } | { [ 0.0422] } | { [ 0.0055] }     | { [ 2. |
| { 'BND' } | { '201510281900' } | { [ 0] }      | { [ 0] }      | { [ 0] }          | { [    |
| { 'BND' } | { '201510282000' } | { [ 0] }      | { [ 0] }      | { [ 0] }          | { [    |

|           |   |                    |     |       |     |       |     |       |     |
|-----------|---|--------------------|-----|-------|-----|-------|-----|-------|-----|
| { 'BND' } | } | { '201510282100' } | { [ | 0 ] } | { [ | 0 ] } | { [ | 0 ] } | { [ |
| { 'BND' } | } | { '201510282200' } | { [ | 0 ] } | { [ | 0 ] } | { [ | 0 ] } | { [ |
| { 'BND' } | } | { '201510282300' } | { [ | 0 ] } | { [ | 0 ] } | { [ | 0 ] } | { [ |
| { 'BND' } | } | { '201510291900' } | { [ | 0 ] } | { [ | 0 ] } | { [ | 0 ] } | { [ |
| { 'BND' } | } | { '201510292000' } | { [ | 0 ] } | { [ | 0 ] } | { [ | 0 ] } | { [ |
| { 'BND' } | } | { '201510292100' } | { [ | 0 ] } | { [ | 0 ] } | { [ | 0 ] } | { [ |
| { 'BND' } | } | { '201510292200' } | { [ | 0 ] } | { [ | 0 ] } | { [ | 0 ] } | { [ |
| { 'BND' } | } | { '201510301900' } | { [ | 0 ] } | { [ | 0 ] } | { [ | 0 ] } | { [ |
| { 'BND' } | } | { '201510302000' } | { [ | 0 ] } | { [ | 0 ] } | { [ | 0 ] } | { [ |
| { 'BND' } | } | { '201510302100' } | { [ | 0 ] } | { [ | 0 ] } | { [ | 0 ] } | { [ |
| { 'BND' } | } | { '201510302200' } | { [ | 0 ] } | { [ | 0 ] } | { [ | 0 ] } | { [ |

Columns 10 through 18

|                    |            |                    |            |                    |            |                    |            |                    |            |                    |            |                    |            |                    |            |                    |            |
|--------------------|------------|--------------------|------------|--------------------|------------|--------------------|------------|--------------------|------------|--------------------|------------|--------------------|------------|--------------------|------------|--------------------|------------|
| { 'ONT' }          | }          |
| { '201510242100' } | }          | { '201510242200' } | }          | { '201510242300' } | }          | { '201510251900' } | }          | { '201510252000' } | }          | { '201510252100' } | }          | { '201510252200' } | }          | { '201510252300' } | }          | { '201510252400' } | }          |
| { [                | 0.2462 ] } | { [                | 0.2486 ] } | { [                | 0.2733 ] } | { [                | 0.1947 ] } | { [                | 0.2460 ] } | { [                | 0.2461 ] } | { [                | 0.2462 ] } | { [                | 0.2463 ] } | { [                | 0.2464 ] } |
| { [                | 0.2475 ] } | { [                | 0.3244 ] } | { [                | 0.3752 ] } | { [                | 0.1108 ] } | { [                | 0.1487 ] } | { [                | 0.1488 ] } | { [                | 0.1489 ] } | { [                | 0.1490 ] } | { [                | 0.1491 ] } |
| { [                | 0.0419 ] } | { [                | 0.0558 ] } | { [                | 0.0361 ] } | { [                | 0.0121 ] } | { [                | 0.0141 ] } | { [                | 0.0142 ] } | { [                | 0.0143 ] } | { [                | 0.0144 ] } | { [                | 0.0145 ] } |
| { [                | 0.0212 ] } | { [                | 0.0330 ] } | { [                | 0.0196 ] } | { [                | 0.0076 ] } | { [                | 0.0086 ] } | { [                | 0.0087 ] } | { [                | 0.0088 ] } | { [                | 0.0089 ] } | { [                | 0.0090 ] } |
| { [                | 0.2034 ] } | { [                | 0.4247 ] } | { [                | 0.3691 ] } | { [                | 0.0480 ] } | { [                | 0.0548 ] } | { [                | 0.0549 ] } | { [                | 0.0550 ] } | { [                | 0.0551 ] } | { [                | 0.0552 ] } |
| { [                | 0.3773 ] } | { [                | 0.2513 ] } | { [                | 0.2480 ] } | { [                | 0.1534 ] } | { [                | 0.1772 ] } | { [                | 0.1773 ] } | { [                | 0.1774 ] } | { [                | 0.1775 ] } | { [                | 0.1776 ] } |
| { [                | 0.6805 ] } | { [                | 0.4025 ] } | { [                | 0.3824 ] } | { [                | 0.1227 ] } | { [                | 0.1421 ] } | { [                | 0.1422 ] } | { [                | 0.1423 ] } | { [                | 0.1424 ] } | { [                | 0.1425 ] } |
| { [                | 1 ] }      | { [                | 0.4583 ] } | { [                | 0.4740 ] } | { [                | 0.1285 ] } | { [                | 0.1485 ] } | { [                | 0.1486 ] } | { [                | 0.1487 ] } | { [                | 0.1488 ] } | { [                | 0.1489 ] } |
| { [                | 0.4583 ] } | { [                | 1 ] }      | { [                | 0.5826 ] } | { [                | 0.0822 ] } | { [                | 0.0988 ] } | { [                | 0.0989 ] } | { [                | 0.0990 ] } | { [                | 0.0991 ] } | { [                | 0.0992 ] } |
| { [                | 0.4740 ] } | { [                | 0.5826 ] } | { [                | 1 ] }      | { [                | 0.0978 ] } | { [                | 0.1112 ] } | { [                | 0.1113 ] } | { [                | 0.1114 ] } | { [                | 0.1115 ] } | { [                | 0.1116 ] } |
| { [                | 0.1285 ] } | { [                | 0.0822 ] } | { [                | 0.0978 ] } | { [                | 1 ] }      | { [                | 0.6506 ] } | { [                | 0.6507 ] } | { [                | 0.6508 ] } | { [                | 0.6509 ] } | { [                | 0.6510 ] } |
| { [                | 0.1485 ] } | { [                | 0.0988 ] } | { [                | 0.1112 ] } | { [                | 0.6506 ] } | { [                | 1 ] }      | { [                | 0.5530 ] } | { [                | 0.5531 ] } | { [                | 0.5532 ] } | { [                | 0.5533 ] } |
| { [                | 0.2269 ] } | { [                | 0.1405 ] } | { [                | 0.1729 ] } | { [                | 0.3877 ] } | { [                | 0.5530 ] } | { [                | 1 ] }      | { [                | 0.0983 ] } | { [                | 0.0984 ] } | { [                | 0.0985 ] } |
| { [                | 0.0917 ] } | { [                | 0.0755 ] } | { [                | 0.0861 ] } | { [                | 0.0719 ] } | { [                | 0.0983 ] } | { [                | 0.0984 ] } | { [                | 1 ] }      | { [                | 0.0574 ] } | { [                | 0.0575 ] } |
| { [                | 0.0630 ] } | { [                | 0.0358 ] } | { [                | 0.0488 ] } | { [                | 0.0462 ] } | { [                | 0.0574 ] } | { [                | 0.0575 ] } | { [                | 0.0576 ] } | { [                | 0.0577 ] } | { [                | 0.0578 ] } |
| { [                | 0.1778 ] } | { [                | 0.1394 ] } | { [                | 0.1520 ] } | { [                | 0.4628 ] } | { [                | 0.5010 ] } | { [                | 0.5011 ] } | { [                | 0.5012 ] } | { [                | 0.5013 ] } | { [                | 0.5014 ] } |
| { [                | 0.2916 ] } | { [                | 0.2084 ] } | { [                | 0.2320 ] } | { [                | 0.2663 ] } | { [                | 0.3312 ] } | { [                | 0.3313 ] } | { [                | 0.3314 ] } | { [                | 0.3315 ] } | { [                | 0.3316 ] } |
| { [                | 0.3125 ] } | { [                | 0.2149 ] } | { [                | 0.2799 ] } | { [                | 0.2187 ] } | { [                | 0.2665 ] } | { [                | 0.2666 ] } | { [                | 0.2667 ] } | { [                | 0.2668 ] } | { [                | 0.2669 ] } |
| { [                | 0.2991 ] } | { [                | 0.2644 ] } | { [                | 0.3328 ] } | { [                | 0.1099 ] } | { [                | 0.1279 ] } | { [                | 0.1280 ] } | { [                | 0.1281 ] } | { [                | 0.1282 ] } | { [                | 0.1283 ] } |
| { [                | 0.2249 ] } | { [                | 0.2368 ] } | { [                | 0.3132 ] } | { [                | 0.0844 ] } | { [                | 0.0936 ] } | { [                | 0.0937 ] } | { [                | 0.0938 ] } | { [                | 0.0939 ] } | { [                | 0.0940 ] } |
| { [                | 0.0668 ] } | { [                | 0.0573 ] } | { [                | 0.0705 ] } | { [                | 0.1449 ] } | { [                | 0.1442 ] } | { [                | 0.1443 ] } | { [                | 0.1444 ] } | { [                | 0.1445 ] } | { [                | 0.1446 ] } |
| { [                | 0.1015 ] } | { [                | 0.0923 ] } | { [                | 0.1150 ] } | { [                | 0.1188 ] } | { [                | 0.1350 ] } | { [                | 0.1351 ] } | { [                | 0.1352 ] } | { [                | 0.1353 ] } | { [                | 0.1354 ] } |
| { [                | 0.0962 ] } | { [                | ...        |                    |            |                    |            |                    |            |                    |            |                    |            |                    |            |                    |            |

# Plot footprint loami and JSD correlation of observation from ONT site collected 2015-10-23::1900 with all other observations

See variable tempAreaCover for observation time with IOAMI correlation matrix

Observation time is same for both JSD and IOAMI correlation matrix

```
close all % close all existing figures
% Note All correlation is between 0 and 1
% Note Correlation with Itself is one;
% Empty display to create Gap between Figures
disp(' ');
```

```
disp(' ');
```

```
disp(' ');
```

```

plot(IOAMI_CORR(1:end,1)); % line plot of IOAMI correlation of ONT obs with all other obs
hold on % hold to plot another line
plot(JSD(1:end,1)); % line plot of IOAMI correlation of ONT obs with all other obs
% Labels and Title for Plots
ylim([0 1])
ylabel('Correlation','FontSize',14)
xlabel({'Observation (see first column of','variable tempAreaCover for time and towers'
legend({'IOAMI','JSD'},'Location','northwest','FontSize',14)
title({'Correlation between footprint of an ONT Observation',' (2015-10-23::1900) with
grid on % show grid on the plot
set(gca,'FontSize',14)
hold off

```

### Correlation between footprint of an ONT Observation (2015-10-23::1900) with other footprints

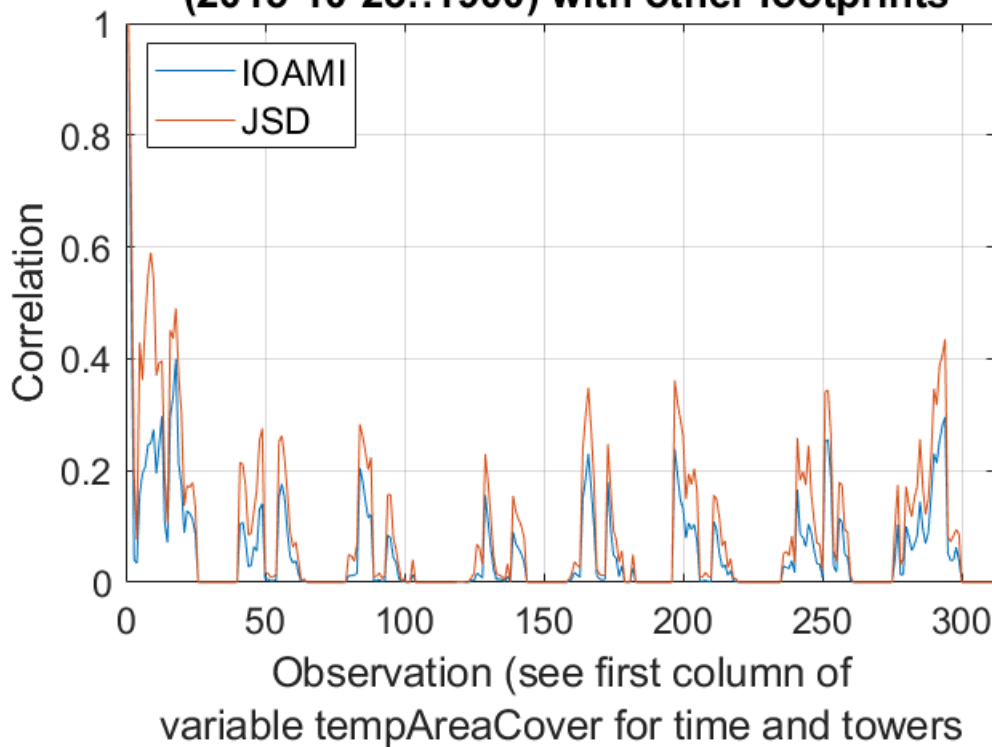

## COMPUTE SPATIO-TEMPORAL AREA OF DOMINANCE (STAD)

```

% STAD: We WILL APPLY STAD ON MEAN SENSITIVITY DUE TO TOTAL NO OF
% OBSERVATIONS THAT VARIES BY SITE
% Compute Mean Sensitivity
obsTowers(obsTime(:,2)==1)={'ONT'}; % Ontario
obsTowers(obsTime(:,2)==2)={'FUL'}; % Fullerton
obsTowers(obsTime(:,2)==3)={'CMP'}; % Compton
obsTowers(obsTime(:,2)==4)={'GRA'}; % Granada Hills
obsTowers(obsTime(:,2)==5)={'USC'}; % University of Souther California
obsTowers(obsTime(:,2)==6)={'UCI'}; % University of California Irvine

```



```

obsTowers(obsTime(:,2)==7)={'PSA'}; % Pasadena
obsTowers(obsTime(:,2)==8)={'BND'}; % San Bernardino
% Mean H Column Wise
H_Mean_Sensitivity=[mean(H_ONT)' mean(H_FUL)' mean(H_CMP)' mean(H_GRA)' mean(H_USC)' ...
    mean(H_UCI)' mean(H_PSA)' mean(H_BND)'];
% we have two time period for which we are computing fluxes therefore we
% sum sensitivities to get it for one time-period that would cover a 4-day
% overlapping time period
H_Mean_Sensitivity=full(H_Mean_Sensitivity(1:fluxD,:)+H_Mean_Sensitivity(fluxD+1:end,:));
% Find Gridcells of Dominance
loopLimit=size(H_Mean_Sensitivity,2);
storeDominanceIndex=NaN*ones(fluxD,1);
maxH=full(max(H_Mean_Sensitivity,[],2));
for i=1:loopLimit
    zeroH=maxH-H_Mean_Sensitivity(:,i);
    iR=find(zeroH==0);
    storeDominanceIndex(iR,1)=i;
end

```

## PLOT STAD

```

% This is our plotting grid
mapgrid=ones(size(gridlat1,1),size(gridlon1,2))*NaN;
for i = 1: fluxD
    mapgrid(index(i,1),index(i,2))=storeDominanceIndex(i);
end
titles ='STAD FOR ALL SITES';
h=pcolor(gridlon1,gridlat1,mapgrid);
set(h, 'EdgeColor', 'none');
shading flat; % do not interpolate pixels
axis on;      % display axis
axis tight;   % no white borders
axis image;   % real x,y scaling
set(gca,'fontsize',16)
ylabel('Latitude')
xlabel('Longitude')
title(titles,'FontSize', 16,'Fontname','Arial')
hold on
plot(towerCoord(:,2), towerCoord(:,1),'o','MarkerEdgeColor',[0 .5 .5],...
    'MarkerFaceColor','red' );
text(towerCoord(:,2),towerCoord(:,1),towerNames,'VerticalAlignment',...
    'top','FontSize', 16,'Fontname','Arial','Color','#EDB120')
hold off

```

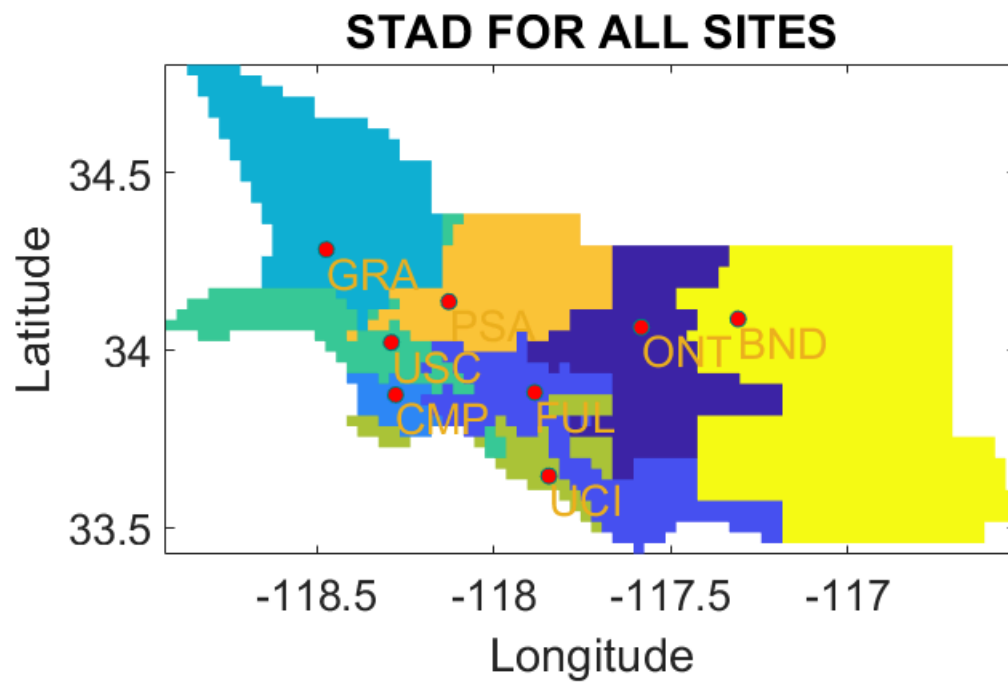

```
% clear grid* IOAMI* index i j JSD* eig* correlatio* dataPath* normalized* mapgrid norm
%   H_Mean_Sensitivity latlon loopLimit titles store* temp* time* no h max* unique* ze
%   noTowers row X obs* tower*
```
